1 **Functional characterization of clinical isolates of the opportunistic fungal**  
2 **pathogen *Aspergillus nidulans***

3  
4 Rafael Wesley Bastos<sup>a,b,c</sup>, Clara Valero<sup>a</sup>, Lilian Pereira Silva<sup>a</sup>, Taylor Schoen<sup>b,c</sup>,  
5 Milton Drott<sup>b</sup>, Verônica Brauer<sup>d</sup>, Rafael Silva-Rocha<sup>d</sup>, Abigail Lind<sup>e</sup>, Jacob L.  
6 Steenwyk<sup>e</sup>, Antonis Rokas<sup>e</sup>, Fernando Rodrigues<sup>f,g</sup>, Agustin Resendiz-Sharp<sup>h</sup>,  
7 Katrien Lagrou<sup>h,i</sup>, Marina Marcet-Houben<sup>j,k</sup>, Toni Gabaldón<sup>j,k,l</sup>, Erin McDonnell<sup>m</sup>,  
8 Ian Reid<sup>m</sup>, Adrian Tsang<sup>m</sup>, Berl R. Oakley<sup>n</sup>, Flávio Vieira Loures<sup>o</sup>, Fausto  
9 Almeida<sup>d</sup>, Anna Huttenlocher<sup>c</sup>, Nancy P. Keller<sup>b</sup>, Laure Nicolas Annick Ries<sup>d\*</sup>,  
10 and Gustavo H. Goldman<sup>a\*</sup>

11  
12 <sup>a</sup>Faculdade de Ciências Farmacêuticas de Ribeirão Preto, Universidade de São  
13 Paulo, Ribeirão Preto, Brazil  
14 <sup>b</sup>Department of Medical Microbiology and Immunology, University of Wisconsin-  
15 Madison, Madison, Wisconsin, United States of America  
16 <sup>c</sup>Department of Pediatrics, University of Wisconsin-Madison, Madison,  
17 Wisconsin, United States of America  
18 <sup>d</sup>Faculdade de Medicina de Ribeirão Preto, Universidade de São Paulo,  
19 Ribeirão Preto, Brazil  
20 <sup>e</sup>Department of Biomedical Informatics, Vanderbilt University School of  
21 Medicine, Nashville, Tennessee, United States of America  
22 <sup>f</sup>Life and Health Sciences Research Institute (ICVS), School of Medicine,  
23 University of Minho, Braga, Portugal  
24 <sup>g</sup>ICVS/3B's - PT Government Associate Laboratory, Braga/Guimarães, Portugal  
25 <sup>h</sup>Laboratory of Clinical Bacteriology and Mycology, Department of Microbiology,  
26 Immunology and Transplantation, KU Leuven, Leuven, Belgium  
27 <sup>i</sup>National Reference Center for Mycosis, University Hospitals Leuven, Leuven,  
28 Belgium; Centre for Genomic Regulation (CRG)  
29 <sup>j</sup>Life Sciences Program. Barcelona Supercomputing Centre (BSC-CNS). Jordi  
30 Girona, 29. 08034. Barcelona, Spain.  
31 <sup>k</sup>Mechanisms of Disease Program. Institute for Research in Biomedicine (IRB).  
32 C/ Baldiri Reixac 10. 08028 Barcelona, Spain.  
33 <sup>l</sup>ICREA, Pg. Lluís Companys 23, 08010 Barcelona, Spain  
34 <sup>m</sup>Centre for Structural and Functional Genomics, Concordia University,  
35 Montreal, Quebec, Canada; Department of Molecular Biosciences  
36 <sup>n</sup>University of Kansas, Lawrence, Kansas, United States  
37 <sup>o</sup>Instituto de Ciência e Tecnologia, Universidade Federal de São Paulo, São  
38 José dos Campos, Brazil

39  
40 Running head: Characterization of *Aspergillus nidulans* clinical isolates

41

42 #Address correspondence to Gustavo H. Goldman, [ggoldman@usp.br](mailto:ggoldman@usp.br); or to

43 Laure NA Ries, [rieslaure13@gmail.com](mailto:rieslaure13@gmail.com)

44

45 Laure Nicolas Annick Ries and Gustavo Henrique Goldman jointly supervised

46 the work

47

48 **Abstract**

49 *Aspergillus nidulans* is an opportunistic fungal pathogen in patients with  
50 immunodeficiency and virulence of *A. nidulans* isolates has mainly been studied  
51 in the context of the chronic granulomatous disease (CGD), with  
52 characterization of clinical isolates obtained from non-CGD patients remaining  
53 elusive. This study therefore carried out a detailed biological characterization of  
54 two *A. nidulans* clinical isolates (CIs), obtained from a patient with breast  
55 carcinoma and pneumonia and from a patient with cystic fibrosis that underwent  
56 lung transplantation, and compared them to the reference, non-clinical A4  
57 strain. Both CIs presented increased growth in comparison to the reference  
58 strain in the presence of physiologically-relevant carbon sources. Metabolomic  
59 analyses showed that the three strains are metabolically very different from  
60 each other in these carbon sources. Furthermore, the CIs were highly  
61 susceptible to cell wall perturbing agents but not to other physiologically-  
62 relevant stresses. Genome analyses identified several frame-shift variants in  
63 genes encoding cell wall integrity (CWI) signalling components. Significant  
64 differences in CWI signalling were confirmed by western blotting among the  
65 three strains. *In vivo* virulence studies using several different models revealed  
66 that strain MO80069 had significantly higher virulence in hosts with impaired  
67 neutrophil function when compared to the other strains. In summary, this study  
68 presents detailed biological characterization of two *A. nidulans sensu stricto*  
69 clinical isolates. Just like in *A. fumigatus*, strain heterogeneity exists in *A.*  
70 *nidulans* clinical strains that can define virulence traits. Further studies are  
71 required to fully characterize *A. nidulans* strain-specific virulence traits and  
72 pathogenicity.

73           **Importance**

74           Immunocompromised patients are susceptible to infections with  
75 opportunistic filamentous fungi from the genus *Aspergillus*. Although *A.*  
76 *fumigatus* is the main etiological agent of *Aspergillus spp.*-related infections,  
77 other species, such as *A. nidulans* are prevalent in a condition-specific manner.  
78 *A. nidulans* is a predominant infective agent in patients suffering from chronic  
79 granulomatous disease (CGD). *A. nidulans* isolates have mainly been studied in  
80 the context of CGD, although infection with *A. nidulans* also occurs in non-CGD  
81 patients. This study carried out a detailed biological characterization of two non-  
82 CGD *A. nidulans* clinical isolates and compared it to a reference strain.  
83 Phenotypic, metabolomic and genomic analyses highlight fundamental  
84 differences in carbon source utilization, stress responses and maintenance of  
85 cell wall integrity among the strains. One clinical strain had increased virulence  
86 in models with impaired neutrophil function. Just as in *A. fumigatus*, strain  
87 heterogeneity exists in *A. nidulans* clinical strains that can define virulence  
88 traits.

89

90

91

92

93

94

95           **Introduction**

96           Fungal pathogen-related infections are now estimated to result in a  
97 higher number of human deaths as tuberculosis or malaria alone (1-3). The  
98 majority of systemic fungal infections are caused by *Candida spp.*,  
99 *Pneumocystis spp.*, *Cryptococcus spp.* and *Aspergillus spp.* (4,5). Of the  
100 hundreds of known *Aspergillus spp.*, only a few cause disease in animals, with  
101 the most prominent being *A. fumigatus*, *A. flavus*, *A. nidulans*, *A. niger* and *A.*  
102 *terreus* (6,7).

103           The primary route of infection of *Aspergillus spp.* is via the inhalation of  
104 conidia (asexual spores). In immunocompetent individuals, inhaled conidia are  
105 rapidly cleared by pulmonary resident and recruited neutrophils and  
106 macrophages, together preventing the onset of infection (8-10). However,  
107 disturbances to the immune system may render an individual susceptible to  
108 infection by *Aspergillus spp.* (11). The severity of infection largely depends on  
109 fungal species and genotype, the host immunological status and host lung  
110 structure (6). Invasive Aspergillosis (IA) is the most severe disease caused by  
111 *Aspergillus spp.*, and is characterized by systemic host invasion, resulting in  
112 high mortality rates (30-95%) (2,10,11).

113           Patient populations with the highest risk of IA are those with prolonged  
114 neutropenia from intensive myeloablative chemotherapy and those with genetic  
115 disorders resulting in primary immune deficiencies, such as chronic  
116 granulomatous disease (CGD) (12,13). CGD is a genetic disorder that affects 1  
117 in 250,000 people and in ~80% of all cases subjects are of the male sex. CGD  
118 is caused by mutations in the genes encoding any of the five structural  
119 components of the Nicotinamide Adenine Dinucleotide Phosphate (NADPH) –

120 oxidase complex, an enzyme complex important for superoxide anion and  
121 downstream reactive oxygen species (ROS) production in phagocytic cells (14).  
122 As a result, immune cells are unable to efficiently kill microorganisms and these  
123 microorganisms can then become pathogenic in such patients (13,14)

124         Although *A. fumigatus* is the main etiological agent of *Aspergillus*-related  
125 infections in immunocompromised patients; other *Aspergillus* spp. have been  
126 found to have a high infection rate under some conditions. *A. nidulans* infections  
127 are not commonly reported in immunocompromised patients, except for  
128 subjects suffering from CGD (15,16). In CGD patients, *A. fumigatus* and *A.*  
129 *nidulans* are responsible for 44% and 23% respectively, of all fungal infections  
130 (15,16). Infections with *A. nidulans* cause mortality in 27-32% of CGD patients  
131 (15) and in comparison to *A. fumigatus*, *A. nidulans* isolates have higher  
132 virulence, invasiveness and dissemination, and resistance to antifungal drugs in  
133 these patients (17). Hence, *A. nidulans* infections have been studied mainly in  
134 the context of CGD although this fungal species can also be virulent in non-  
135 CGD, immunocompromised patients (18). In comparison to *A. fumigatus*,  
136 investigations into *A. nidulans* isolate virulence have been neglected with very  
137 few studies having investigated the genetic and metabolic features of *A.*  
138 *nidulans* clinical strains, isolated from CGD and non-CGD patients, in the  
139 context of stress responses encountered during human host infection as well as  
140 when interacting with host immune responses (18-21).

141         The aim of this work was to carry out a detailed molecular, phenotypic  
142 and virulence characterization of two *A. nidulans* clinical isolates from a) a  
143 patient with breast carcinoma and pneumonia and b) a patient with cystic

144 fibrosis who underwent lung transplantation and compare them to the well-  
145 characterized, wild-type isolate FGSC A4.

## 146 **Results**

### 147 **The *A. nidulans* clinical isolates have increased growth, in comparison to** 148 **the reference strain, in the presence of alternative carbon sources**

149 Fungal metabolic plasticity, which allows growth in unique and diverse  
150 ambient and host microenvironments, has long been hypothesized to contribute  
151 to *Aspergillus* virulence, with carbon sources such as glucose (22), ethanol (23)  
152 and acetate (24) being predicted to be actively used during *in vivo* infection. In  
153 addition, fatty acids and lipids are also thought to serve as major nutrient  
154 sources during mammalian host colonization as is evident by the importance of  
155 key glyoxylate cycle enzymes in fungal virulence (25). We therefore  
156 characterized growth, by determining fungal dry weight, of the two *A. nidulans*  
157 CIs in the presence of minimal medium (MM) supplemented with different  
158 physiologically-relevant carbon sources, namely glucose, acetate, ethanol and  
159 lipids, and compared it to the FGSC A4 reference strain. A significant reduction  
160 in growth was observed for both CIs in the presence of glucose whereas they  
161 had significantly increased growth in the presence of the alternative carbon  
162 source ethanol, casamino acid and the lipids Tween 20 (a source of lauric,  
163 palmitic, and myristic acids) (26), Tween 80 (which contains principally oleate)  
164 (26) and olive oil (triacylglycerols and free fatty acids) (27) (Fig. 1). In contrast,  
165 no difference in fungal biomass accumulation was observed in the presence of  
166 acetate and the lung-resident glycoprotein mucin (Fig. 1). These results suggest  
167 that the *A. nidulans* CIs have improved growth relative to the reference strain in

168 the presence of most of the alternative carbon sources tested here, including  
169 different lipids.

170

171 **Metabolic profiles differ among the *A. nidulans* clinical isolates and**  
172 **reference strain in the presence of different carbon sources**

173 To further investigate nutrient utilization in the *A. nidulans* CIs, the  
174 metabolic profiles of strains MO80069 and SP-2605-48 were determined and  
175 compared to the reference strain A4. Metabolomics was carried out on cellular  
176 extracts from strains grown for 24 h in fructose-rich MM and then transferred for  
177 16 h to MM supplemented with glucose (CIs present reduced growth), ethanol  
178 (CIs had increased growth), acetate and mucin (no difference in growth). A total  
179 of 40 different metabolites were identified when strains were grown in the  
180 presence of glucose and ethanol, whereas 44 different metabolites were  
181 identified when strains were grown in the presence of acetate and mucin (Table  
182 S1). When comparing metabolite quantities of strain MO80069 to the reference  
183 strain, 18 (45%), 22 (55%), 23 (52%) and 24 (55%) metabolite quantities were  
184 significantly ( $p$ -value < 0.05) different from the quantities in the reference strain  
185 when grown in glucose, ethanol, acetate and mucin respectively (Table S1,  
186 Table 1). In strain SP-2505-48, 15 (38%), 23 (58%), 30 (68%) and 14 (32%)  
187 metabolite quantities, that were normalized by fungal dry weight, were  
188 significantly ( $p$ -value < 0.05) different from the quantities in the reference strain  
189 in the presence of glucose, ethanol, acetate and mucin respectively (Table S1,  
190 Table 1). Principal component analysis (PCA) and Hierarchical clustering  
191 analysis (HCA) of identified metabolite quantities showed that the CIs clustered  
192 apart from the reference strain and from each other in all tested carbon sources



193 (Fig. S1-S2), indicating that they are metabolically different from the reference  
194 strain and from each other.

195 When further focusing on metabolites that were significantly different in  
196 quantity between the CIs and the reference strain, we observed that in the  
197 presence of glucose and ethanol, the majority of identified metabolites were  
198 present in significant lower quantities in comparison with the reference strain;  
199 whereas both CIs had significant higher metabolite quantities in the presence of  
200 acetate in comparison with the reference strain (Fig. 2A-C). Furthermore, when  
201 the *A. nidulans* CIs were cultivated in mucin-rich minimal medium, only 9 out of  
202 29 significantly different metabolite quantities were identified in both strains  
203 whereas the remaining metabolite quantities were strain-specific, suggesting  
204 that the metabolic profiles of the two differed drastically the presence of this  
205 carbon source (Fig. 2D).

206 When the CIs were grown in a glucose-rich MM, amino acids were found  
207 in lower quantities in both CIs when compared to the reference strain. In  
208 contrast, pentose phosphate pathway (PPP) intermediates, glycerol, glycerol  
209 derivatives and aromatic amino acids were detected in significantly higher  
210 quantities in this carbon source (Fig. 2A). In an ethanol-rich MM, significantly  
211 lower quantities of various amino acids as well as of the citric acid cycle  
212 intermediate citrate were detected in the CIs; whereas increased quantities of  
213 several amino acid pathway intermediates, the carbon compounds glycerol,  
214 mannitol and trehalose, PPP intermediates and lactate were detected in the CIs  
215 when compared to the reference strain in this carbon source (Fig. 2C). In  
216 acetate-rich MM, most identified metabolites, notably a variety of amino acids,  
217 were present in significantly higher amounts in the CIs when compared to the

218 reference strain, with the exception of some amino acids, PPP intermediates,  
219 spermidine, rhamnose and urea (Fig. 2B). When strains were grown in mucin-  
220 rich MM, differences in the quantities of a variety of amino acids were observed,  
221 whereas trehalose was present in significantly lower quantities and urea in  
222 significantly higher quantities in both CIs when compared to the reference strain  
223 (Fig. 2D). In summary, these results suggest significant differences in amino  
224 acid biosynthesis and degradation, carbon source storage compounds and  
225 degradation among the different *A. nidulans* strains in a condition-dependent  
226 manner.

227 To determine if any metabolic pathways were specifically enriched in the  
228 *A. nidulans* CIs in comparison to the reference strain, pathway enrichment  
229 analyses was carried out on the metabolome data from glucose-, ethanol-,  
230 acetate- and mucin-grown cultures. In all tested carbon sources, with the  
231 exception of mucin for isolate SP-2605-48, there was significant enrichment for  
232 aminoacyl-tRNA biosynthesis (Table 2). The pathway constituting the  
233 metabolism of arginine and proline, was significantly enriched in both clinical  
234 isolates when grown in the presence of glucose and ethanol and in isolate SP-  
235 2605-48 when incubated in mucin-rich media (Table 2). When acetate was used  
236 as the sole carbon and energy source, enrichment of the metabolism of these  
237 amino acids was not observed (Table 2). In addition, metabolites identified for  
238 strain SP-2605-48 in the presence of mucin and ethanol showed pathway  
239 enrichment in nitrogen metabolism (Table 2). In agreement with the  
240 aforementioned differences in amino acid quantities, these results suggest that  
241 the CIs exhibit differences in nitrogen metabolism in a carbon source-  
242 independent manner when compared to the reference strain.

243

244 **The *A. nidulans* clinical isolates are more sensitive to hydrogen peroxide-**  
245 **induced oxidative stress and cell wall-perturbing agents when compared**  
246 **to the reference strain**

247 Due to the significant metabolic differences observed between the CIs  
248 and the reference strain in the presence of physiological-relevant carbon  
249 sources, and that primary metabolism (carbon source utilization) has been  
250 shown to impact virulence factors in opportunistic pathogenic fungi (28,29), we  
251 hypothesized similar differences could be observed in the presence of  
252 physiological-relevant stress conditions. One such virulence factor is the fungal  
253 cell wall, which is crucial for protection, interaction with and modulation or  
254 evasion of the host immune system (30). In addition, cell wall polysaccharide  
255 composition is dependent on carbon source primary metabolism (28,29,31).

256 The production of reactive oxygen species (ROS), such as H<sub>2</sub>O<sub>2</sub>, and  
257 subsequent augmentation of cellular oxidative stress is a strategy employed by  
258 the mammalian immune system to combat potential invading pathogenic  
259 microorganisms (14). The *A. nidulans* reference strain and the two CIs were  
260 therefore grown in the presence of hydrogen peroxide (H<sub>2</sub>O<sub>2</sub>) and the oxidative  
261 stress-inducing compound menadione. Both CIs were more sensitive (reduced  
262 growth) to high concentrations of H<sub>2</sub>O<sub>2</sub> (Fig. S3A), whereas they were resistant  
263 to menadione when compared to the reference strain (Fig. S3B). Furthermore,  
264 iron sequestration and elevated body temperature are additional physiological  
265 stress responses exerted by the host to prevent and/or control infection  
266 progression (32). Strains were therefore grown on iron-poor, glucose-rich  
267 minimal medium supplemented without (control) or with the iron chelators BPS

268 and ferrozine (Fig. S3C), as well as in the presence of increasing temperatures  
269 (Fig. S3D). Growth of all strains was similar in these conditions, although strain  
270 MO80069 grew slightly more in the presence of the iron chelators (Fig. S3C).  
271 Lastly, growth of all strains was assessed in the presence of the cell wall  
272 perturbing agents caspofungin, congo red (CR) and calcofluor white (CFW).  
273 The echinocandin caspofungin is a competitive inhibitor of the cell wall enzyme  
274  $\beta$ -1,3-glucan synthase (33) while CR and CFW bind to glucan or chitin chains  
275 respectively (34,35). CR and CFW therefore interfere with the cross-linking of  
276 cell wall polysaccharides, resulting in a reduction of cell wall stability. Both  
277 clinical isolates were more sensitive to low and medium concentrations of  
278 caspofungin when compared to the reference strain, whereas all three strains  
279 grew similarly in the highest tested caspofungin concentration (8  $\mu$ g/ml) (Fig.  
280 3A). Similarly, both clinical strains were more sensitive to lower concentrations  
281 of CR whereas no significant difference in growth was observed in the presence  
282 of 50  $\mu$ g/ml CR between all strains (Fig. 3B). In contrast, the CIs had  
283 significantly reduced growth in the presence of all tested CFW concentrations  
284 when compared to the reference strain (Fig. 3C).

285 In summary, the aforementioned results suggest strain-specific  
286 differences in the response to different physiological stress conditions and infer  
287 that the two *A. nidulans* CIs are more sensitive to cell wall-perturbing agents  
288 than the reference strain.

289

290

291

292 **The *A. nidulans* clinical isolates do not display increased resistance to**  
293 **azoles and amphotericin B**

294 Since both CIs showed increased susceptibility to caspofungin, an  
295 echinocandin that is being used as a second line treatment for fungal infections  
296 (33), and to other cell wall-perturbing agents, we expanded our analyses to  
297 include two additional antifungal drugs classes. Specifically, we followed the  
298 “Guidelines for the Diagnosis and Management of Aspergillosis”, which, in most  
299 of the cases, recommend to treat aspergillosis with azoles and polyene drugs  
300 (11), both of which are known to interfere with the biosynthesis or  
301 physicochemical properties of fungal membrane sterols (10). Therefore, we  
302 determined the minimal inhibitory concentrations (MIC) of the azoles  
303 voriconazole, posaconazole and the polyene amphotericin B for all three  
304 strains. No differences in the MICs among all strains to these drugs was  
305 observed (Table 3).

306

307 **Cleistothecia formation is impaired in the *A. nidulans* SP-2605-48 strain**

308 *A. nidulans* is known for its easily inducible sexual cycle, which serves as  
309 a laboratory-based molecular tool for strain construction and studying fungal  
310 sexual reproduction (36). To further characterize *A. nidulans* CI biology, we  
311 assessed whether *A. nidulans* CIs are able to undergo sexual reproduction, by  
312 performing self- and out-crosses for each clinical strain and the reference strain  
313 (control) at 30 and 37 °C.

314 Strains were first crossed with themselves (self-crosses) at 30 °C and 37  
315 °C, and cleistothecia formation was observed for all strains at both  
316 temperatures, except for strain SP-2605-48 at 37 °C (Table 4). Density of

317 cleistothecia (cleistothecia/cm<sup>2</sup>) also varied between strains in a temperature-  
318 dependent manner, with the clinical isolates forming fewer cleistothecia per cm<sup>2</sup>  
319 than when compared to the reference strain at 30 °C and 37 °C (Table 4). In  
320 addition, no difference in ascospore viability was observed among strains  
321 (Table 4).

322 Out-crosses were performed by crossing the *pyrG* (requirement for  
323 uridine and uracil) auxotrophic strains MO80069 and SP-2605-48 with the *paba*  
324 (requirement for para-aminobenzoic acid)-deficient strain R21XR135 (Table 6).  
325 Strain MO80069 produced cleistothecia at both 30 and 37°C whereas strain SP-  
326 2605-48 did not produce any cleistothecia in any of the tested conditions.  
327 Density of cleistothecia was very low at 30°C (0.25 cleistothecia/cm<sup>2</sup>) but  
328 increased to the same number than observed for the self-crosses at 37°C with  
329 high ascospore viability in all cases (Table 4).

330

### 331 **Identification of single nucleotide polymorphisms (SNPs) and copy** 332 **number variations (CNVs) in the *A. nidulans* clinical isolate genomes**

333 The aforementioned phenotyping and metabolomics results indicate  
334 differences between the strains that affect traits such as nutrient source  
335 utilization and resistance to different stresses. These results are in agreement  
336 with studies in *A. fumigatus* that have described great strain heterogeneity in  
337 traits such as growth, fitness and enzyme secretion between different  
338 environmental and clinical isolates (24,37). Indeed, the number of SNPs,  
339 obtained during strain pairwise comparison, in the genomes of different *A.*  
340 *fumigatus* strains, range between ~13,500 (24) and ~50,000 (38,39). Strain  
341 heterogeneity has therefore mainly been investigated in environmental and

342 clinical isolates of *A. fumigatus*, whereas similar studies have not been carried  
343 out for *A. nidulans* isolates. We therefore decided to determine differences at  
344 the genomic level by sequencing the genomes of our two *A. nidulans* CIs and  
345 comparing them to the FGSC A4 reference genome.

346 The genomes of MO80069 and SP-2605-48 aligned at 98.3% and  
347 97.4%, respectively, to the genome of the reference strain FGSC A4 with 99.8%  
348 nucleotide identity. On the other hand, 1.5% and 1.9% of the A4 assembled  
349 genome did not align to the MO800069 and SP-2605-48 genomes respectively,  
350 indicating differences among the genomes of all three strains.

351 A total of 12,956 and 12,399 SNPs with respect to the A4 reference  
352 genome were detected in the genomes of MO80069 and SP-2605-48,  
353 respectively (Table 5, Table S2). When comparing the genome of SP-260548 to  
354 the genome of MO80069, 12,836 SNPs were detected (Table 5, Table S2).  
355 Each SNP mutation was classified as either high, moderate or low, according to  
356 their impact on the DNA codon frame and amino acid sequence. High impact  
357 type mutations encompass frameshift mutations and stop codon gain/loss,  
358 whereas missense mutations, resulting in amino acid changes, are considered  
359 as moderate impact-type mutations. Low impact-type mutations contain all  
360 synonymous mutations and mutations within gene introns and UTRs  
361 (untranslated regions). The genome of MO80069 contained 501 high impact  
362 mutations, 6,271 missense (moderate impact) and 6,184 synonymous (low  
363 impact) mutations in comparison to the reference genome (Table 5, Table S2).  
364 In the genome of SP-2605-48, 465 high impact mutations, 5,896 moderate  
365 impact mutations and 6,038 low impact mutations were detected in comparison  
366 to the reference genome (Table 5, Table S2). When comparing the genomes of

367 both CIs, 426 high impact mutations, 6,288 missense mutations and 6,122  
368 synonym mutations were detected (Table 5, Table S2). All non-synonymous  
369 mutations were distributed throughout the genomes of both CIs and no clear  
370 pattern in mutation accumulation could be observed for any of the 8  
371 chromosomes (Fig. 4-5).

372 In addition, the genomes of both CIs were screened for large-scale (>50  
373 bps) insertions and deletions (indels). In total, 1169 large-scale indels,  
374 consisting of anything between 3 bp to 23 kbp in size, were detected on any of  
375 the eight chromosomes of the CIs when compared to the reference strain  
376 (Supplementary Table 3). Of these, 348 indels were specifically located in the  
377 genome of MO80060, 446 indels were found in the genome of SP-2605-48  
378 only, and 375 indels were located in the genomes of both CIs (Table 5,  
379 Supplementary Table 3). The majority of these indels were insertions (Table 5).  
380 Of the 375 indels found in the genomes of both CIs, 227 (60.5%) indels differed  
381 between the two strains, with the remaining 148 indels being identical for both  
382 strains (Supplementary Table 3).

383

#### 384 **The *A. nidulans* clinical isolates are defect in MpkA accumulation in** 385 **response to cell wall stress**

386 As this work aimed to characterize metabolic utilization of physiologically-  
387 relevant carbon and lipid sources in *A. nidulans* CIs, including acetate and fatty  
388 acids, we screened genes encoding proteins important for carbohydrate and  
389 lipid utilization, cell wall biosynthesis/remodeling and sexual reproduction for the  
390 presence of any of the aforementioned moderate and high impact mutations  
391 (Table S4). Moderate impact (missense) mutations were detected in three



392 genes (*hxkA*; *swoM*; *pfka*), encoding proteins involved in glycolysis  
393 (hexokinase, glucose-6-phosphate isomerase, 6-phosphofructokinase) in both  
394 CIs; whereas four and six missense mutations were found in two genes (*idpA*  
395 and *mdhA*) encoding the enzymes isocitrate dehydrogenase and malate  
396 dehydrogenase of the tricarboxylic acid cycle in the genomes of MO80069 and  
397 SP-2605-48, respectively (Table S4). Similarly, several moderate impact  
398 mutations were found in genes encoding enzymes required for C2-associated  
399 metabolism (acetate, ethanol and fatty acid), including *farA* (transcription factor  
400 regulating fatty acid utilization) and *farB* (transcription factor regulating the  
401 utilization of short-chain fatty acids) in both CIs, *facA* (acetyl-coA synthase),  
402 *acuM* (transcriptional activator required for gluconeogenesis) and *alcM*  
403 (required for ethanol utilization) in SP-2605-48 and *echA* (enoyl-coA hydratase)  
404 in MO80069 (Table S4). Genes encoding proteins that function in the glyoxylate  
405 cycle also contained missense mutations in both CIs (Table S4). Furthermore, a  
406 frameshift mutation was detected in both CIs in *acuL*, encoding a mitochondrial  
407 carrier involved in the utilization of carbon sources that are metabolized via the  
408 Krebs cycle (40) (Table S4). The aforementioned mutations could underlie the  
409 observed differences in phenotypic growth in the presence of different carbon  
410 and lipid sources.

411       Due to the absence of cleistothecia formation in strain SP-2605-48, we  
412 wondered whether this strain contained any mutations in genes encoding  
413 proteins required for *A. nidulans* sexual reproduction. We found 11 and 13  
414 mutations in 7 and 9 genes related to mating in MO80069 and SP-2605-48  
415 genomes, respectively (Table S4). Those mutations include missense and  
416 frameshift mutations in genes involved in the perception of light and dark (*ireA*,

417 *ireB*, *cryA*, *veA*, *velB*), mating processes (*cpcA*, *rosA*, *nosA*) and signal  
418 transduction (*gprH* and *gprD*) (Table S4). Indeed, *rosA* was absent in both CIs  
419 whereas *ireA* was missing from the genome of SP-2605-48. RosA is a  
420 transcriptional repressor of sexual development (41) whereas IreA is a  
421 transcription factor required for the blue light response, important for  
422 developmental processes, including mating.

423         Lastly, as both CIs were sensitive to cell wall perturbing agents, we  
424 screened for mutations in genes encoding enzymes involved in cell wall  
425 biosynthesis and degradation. Compared to the FGSC A4 reference genome,  
426 we found 159 and 90 mutations in 40 and 34 genes involved in cell wall  
427 biosynthesis, integrity and signaling in the genomes of MO80069 and SP-2605-  
428 48, respectively (Table S4). The majority of these mutations were moderate  
429 impact missense mutations in genes that encode components required for 1,3- $\beta$   
430 and  $\alpha$ -glucan, chitin synthesis and degradation, including various types of  
431 glucanases, chitinases and chitin synthases (Table S4). However, 17  
432 (MO80069) and 9 (SP-2605-48) mutations were high impact level mutations  
433 which occurred in genes AN0550 (putative glucan 1,3-beta-glucosidase),  
434 AN0509 (putative chitinase), AN0517 (putative chitinase), AN0549 (putative  
435 chitinase), AN9042 (putative  $\alpha$ -1,3-glucanase), AN6324 (putative  $\alpha$ -  
436 amylase), AN4504 (putative endo-mannanase) and AN0383 (putative endo-  
437 mannanase) (Table S4). In addition, small frameshift mutations were detected  
438 in three genes encoding the mitogen-activated protein kinase (MAPK) kinase  
439 kinase BckA (AN4887), the MAPK MpkA (AN5666) and the transcription factor  
440 RlmA (AN2984) (Table S4). In *A. fumigatus*, BckA and MpkA are components of  
441 the cell wall integrity (CWI) pathway, which ensures the integrity of the cell wall

442 and is activated in response to different cell wall stresses including those  
443 exerted by cell wall-targeting anti-fungal drugs (42). RlmA was shown to act  
444 downstream of MpkA, regulating cell wall biosynthesis-related genes and this  
445 transcription factor is also involved in the direct regulation of MpkA (43).  
446 Mutation in *rlmA* was observed only in the genome of strain SP-2648-05.

447 In order to determine whether the observed frameshift mutations had an  
448 impact on CWI signaling, we carried out a western blot of phosphorylated MpkA  
449 in the presence of NaCl-induced cell wall stress in all three *A. nidulans* strains.  
450 Phosphorylated MpkA levels were normalized by total cellular MpkA. Low levels  
451 of phosphorylated MpkA were detected in the absence of NaCl in all three  
452 strains, but, whereas MpkA protein levels significantly increased upon cell wall  
453 stress in the FGSC A4 reference strain, no phosphorylated MpkA could be  
454 detected in both CIs (Fig. 6). These results suggest that the observed frameshift  
455 mutations in *mpkA* had an effect on MpkA protein levels in the presence of cell  
456 wall stress, potentially being (one of) the cause(s) for the observed increased  
457 sensitivity to cell wall-perturbing agents.

458

459 **The *A. nidulans* clinical isolates do not display increased resistance to *in***  
460 ***vitro*-mediated killing by different types of macrophages and neutrophils**

461 Due to the observed phenotypic and genotypic differences, we wondered  
462 whether the CIs were different in virulence from the reference strain. Virulence  
463 was first characterized in a variety of *in vitro* conditions. Macrophages play an  
464 essential role in clearing *Aspergillus spp* conidia from the lung (8), whereas  
465 neutrophils are predicted to primarily be responsible for eliminating fungal  
466 hyphae (39). To determine whether any strain-specific differences exist in

467 macrophage-mediated phagocytosis and killing, the respective assays were  
468 carried out for all three strains in the presence of murine wild-type and *gp91<sup>phox</sup>*  
469 knockout (CGD) macrophages. Macrophages from CGD patients are impaired  
470 in eliminating conidia from the lung environment, thus rendering the host more  
471 susceptible to fungal infections (20). Both types of macrophages phagocytised a  
472 significantly higher number of conidia from both *A. nidulans* clinical isolates  
473 (~75%) when compared to the reference strain (~ 50%) (Fig. 7A). Indeed,  
474 conidia from all three *A. nidulans* strains had increased viability after  
475 phagocytosis by *gp91<sup>phox</sup>* knockout macrophages than when compared to wild-  
476 type macrophages, confirming the inability of this type of macrophage to  
477 efficiently kill fungal conidia (Fig. 7B). Despite increased phagocytosis of both  
478 CIs, no difference in conidial viability was observed for strain MO80069 when  
479 compared to the reference strain, whereas wild-type but not CGD macrophages  
480 succeeded in killing significantly more SP-2605-48 conidia (Fig. 7B).

481       When challenged with human PMN (polymorphonuclear) cells, fungal  
482 survival was reduced approximately 80% for all three *A. nidulans* strains,  
483 indicating that the neutrophils were actively killing the hyphal germlings (Fig.  
484 7C). No difference in strain survival was observed for the CIs (Fig. 7C). These  
485 results suggest that the *A. nidulans* CIs do not have higher survival rates in the  
486 presence of macrophages and neutrophils.

487

488

489

490

491 **Virulence of the *A. nidulans* clinical isolates depends on the host immune**  
492 **status**

493 We determined the virulence of both *A. nidulans* CIs in animal models  
494 with different immune statuses. As it is well known that *A. fumigatus* strain-  
495 specific virulence is highly dependent on the type of host immunosuppression  
496 and model (24,37, 43), we sought to determine if this would also be the case for  
497 *A. nidulans*. The virulence of *A. nidulans* CIs was assessed in both zebrafish  
498 and murine models of pulmonary and invasive aspergillosis. Furthermore, the  
499 immune system of each animal was manipulated in order to give rise to either  
500 immunocompetent, CGD or neutropenic/neutrophilic models. As with patients,  
501 CGD models of both mice (19) and zebrafish (21) are very susceptible to *A.*  
502 *nidulans* infections. In both immunocompetent- and CGD-type zebrafish and  
503 mice, no difference in virulence between the *A. nidulans* clinical isolates and the  
504 reference strain was observed (Fig. 8A-D). However, the CI MO80069 was  
505 significantly more virulent in neutropenic mice and zebrafish with impaired  
506 neutrophil function when compared to the reference strain, whereas no  
507 difference in virulence was observed for strain SP-2605-48 (Fig. 8E-F). These  
508 results suggest that, like in *A. fumigatus*, *A. nidulans* virulence depends on the  
509 strain and the host immune status.

510

511 **Discussion**

512 *Aspergillus nidulans* is a saprophytic fungus that can act as an  
513 opportunistic human pathogen in a host immune status- and genetic condition-  
514 dependent manner (15,18,44). Infection with *A. nidulans* is prevalent in patients  
515 with chronic granulomatous disease (CGD) and isolates have mainly been

516 characterized in the context of this disorder (14,15). Studies on *A. nidulans*  
517 virulence have been carried out in CGD models (animal and cell culture) and  
518 virulence characteristics have been compared to the primary human  
519 opportunistic fungus *A. fumigatus* (20,21,45,46). *A. fumigatus* infection biology  
520 and characterization of strains that were isolated from immunocompromised  
521 patients with different conditions have received considerable attention in recent  
522 years (24,37,47), whereas similar studies into other pathogenic *Aspergillus spp.*  
523 have been neglected, although it is becoming apparent that non-*A. fumigatus*  
524 species, including cryptic *Aspergillus* species, also contribute to host infection  
525 and invasion (7). This work therefore aimed at providing a detailed phenotypic,  
526 metabolic, genomic and virulence characterization of two *A. nidulans* clinical  
527 isolates (CIs) that were isolated from non-CGD patients.

528         The first CI (MO80069) was isolated from a patient with breast carcinoma  
529 and pneumonia, whereas the other CI (SP-2605-48) was obtained from a  
530 patient with cystic fibrosis who underwent lung transplantation. Genome  
531 sequencing confirmed these strains to be *A. nidulans sensu stricto* and growth  
532 of these strains was characterized in the presence of physiological-relevant  
533 carbon sources. Fungi require carbon sources in large quantities in order to  
534 sustain biosynthetic processes and actively scavenge for them in their  
535 environment, including mammalian hosts (24). Available carbon sources vary  
536 according to the patient's immune status and disease progression, with, for  
537 example, corticosteroid treatment resulting in an increase of fatty and amino  
538 acid concentrations and a decrease of glucose levels in mice lungs (22). Growth  
539 of the two *A. nidulans* strains in the presence of different carbon sources,  
540 differed significantly from the reference strain, with increased biomass

541 accumulation being observed in the presence of alternative (ethanol, lipids,  
542 amino acids) carbon sources and reduced growth in the presence of glucose.  
543 The observed phenotypic differences were corroborated by metabolic and  
544 genomic data which found a number of missense and high impact mutations in  
545 genes encoding enzymes required for alternative carbon source and glucose  
546 utilization. These included missense mutations in genes encoding glycolysis-  
547 and citric acid cycle-related enzymes as well as five missense mutations in the  
548 transcription factor-encoding gene *farA*, which regulates the utilization of short-  
549 and long-chain fatty acids. Whether these mutations alone and/or in  
550 combination with other identified gene mutations are responsible for the  
551 observed growth phenotypes remains to be determined. Nevertheless, it is  
552 noteworthy that these mutations are found in both CIs, suggesting that these  
553 strains are able to grow well in nutrient-poor environments, such as the lung,  
554 when compared the reference strain, which was isolated from the soil  
555 environment. Furthermore, whether these mutations are a result of adaptation  
556 to the host environment also remains subject to future investigations.

557 In addition, we also assessed the resistance of these strains to a variety  
558 of physiological-relevant stress conditions by growing them in the presence of  
559 oxidative- and cell wall stress-inducing compounds, high temperature, iron  
560 limitation and anti-fungal drugs. Some minor strain-specific differences were  
561 observed in these conditions, but the CIs were not significantly more resistant to  
562 these conditions in comparison to the reference strain, including azole- and  
563 polyene-type anti-fungal drugs. It is possible that the patient-specific lung  
564 environment, biofilm formation and/or interactions with other microorganisms  
565 may result in protection from or in the absence of these stresses, thus resulting

566 in strains that do not have increased stress tolerance. In contrast to *Candida*  
567 *albicans*, an opportunistic fungal pathogen which was shown to interact with the  
568 gram-negative bacterium *Pseudomonas aeruginosa* to promote colonisation of  
569 patients with cystic fibrosis in a condition-dependent manner (48), such  
570 interactions have not been investigated for *Aspergillus spp.* *Aspergillus* inter-  
571 species interactions in lung microbiomes of patients with and without cystic  
572 fibrosis therefore remains an intriguing aspect of fungal pathobiology that  
573 warrants further characterization.

574 In contrast, both *A. nidulans* clinical strains were significantly more  
575 sensitive to the cell wall perturbing agents calcofluor white, congo red and  
576 caspofungin (33-35) than the reference strain. These results suggest  
577 differences in cell wall composition and/or organization between the clinical  
578 isolates and the reference strain. When analyzing the respective genome  
579 sequences, we found 159 and 90 mutations in 40 and 34 genes encoding  
580 enzymes required for cell wall glucan and chitin biosynthesis and degradation in  
581 strains MO80069 and SP-2605-48, respectively, when compared to the FGSC-  
582 A4 reference strain. Of particular interest was the identification of high impact  
583 mutations in genes *bckA*, *mpkA*, and *rlmA*, which encode components of the  
584 CWI signaling pathway. Indeed, Western blotting confirmed the absence of  
585 MpkA phosphorylation in the CIs in the presence of cell wall stress. These  
586 results suggest that the observed gene mutations cause an altered CWI  
587 response, resulting in increased sensitivity to cell wall perturbing agents. The  
588 physiological relevance of these findings remains to be determined.

589 *Aspergillus nidulans* is characterized by an easy inducible sexual cycle  
590 as well as by undemanding laboratory-based cultivation and genetic



591 manipulation conditions, and has extensively been used as a model organism to  
592 study sexual reproduction and developmental processes (49). Nevertheless, it  
593 is unknown whether these traits can also be applied to *A. nidulans* clinical  
594 strains and this work therefore assessed the ability of the two CIs to form  
595 cleistothecia in self- and out-crosses. Strain MO80069 produced cleistothecia  
596 and viable ascospores similar to the reference strain in all tested conditions,  
597 whereas strain SP-2605-48 only formed cleistothecia and viable ascospores in  
598 self-crosses at 30°C and not 37°C. This suggests that a certain degree of  
599 heterogeneity exists with regards to sexual reproduction in *A. nidulans* clinical  
600 strains, although a bigger sample size and further studies are required in order  
601 to confirm this. Temperature has been shown to influence cleistothecia  
602 formation in *Aspergillus spp.* with lower temperatures of 30°C resulting in a  
603 higher number of formed cleistothecia (50). Furthermore, we cannot exclude the  
604 possibility that strains such as SP-2605-48 may require a different condition for  
605 sexual reproduction as it is determined by a series of environmental factors that  
606 can either activate or repress sexual development (50). This work identified six  
607 missense mutations in four genes (*veA*, *cpcA*, *fhbB* and *gprH*) encoding  
608 enzymes involved in sexual development and gene *ireA* was absent in the SP-  
609 2605-48 genome when compared to strains FGSC-A4 and MO80069. Genes  
610 *veA*, *cpcA*, *fhbB* and *ireA* encode proteins that are involved in the perception of  
611 environmental signals (50), favouring the hypothesis that SP-2605-48 may  
612 require different/specific conditions for cleistothecia production, although it  
613 remains to be determined whether the aforementioned mutations and *ireA* are  
614 directly linked to the absence of cleistothecia production in strain SP-2605-48 in  
615 the conditions tested here.

616           Lastly, this work examined the *in vivo* virulence of the *A. nidulans* CIs in  
617 different animal models with a variety of immune statuses, as *A. fumigatus*  
618 strain-specific virulence is highly dependent on the type of host  
619 immunosuppression and model (24,37,51). No difference in virulence was  
620 observed in immunocompetent and CGD murine and zebrafish models whereas  
621 strain MO80069 was significantly more virulent in a zebrafish with impaired  
622 neutrophil function and a neutropenic murine model of invasive aspergillosis  
623 than when compared to strains FGSC-A4 and SP-2605-48. These results  
624 suggest that neutrophil recruitment and function at the site of infection are  
625 important for controlling *A. nidulans* infection in both vertebrates. Furthermore,  
626 results are in agreement with studies on *A. fumigatus* which show that virulence  
627 is as much a strain-dependent as it is a host-dependent trait (24,37,39,51).  
628 Furthermore, the tested phenotypes and genome mutations appear to not  
629 correlate with strain virulence, although sample size has to be increased in  
630 order to confirm this in future studies. *Aspergillus* infection biology of  
631 mammalian hosts is a multi-factorial and –faceted process that not only  
632 depends on strain-specific virulence traits (30), but also on the genetic  
633 composition of the host and status of the immune system (52). Furthermore, the  
634 composition and inter-species interactions of the lung microbiome also  
635 influences pathogenicity of a given microorganism, with interactions between  
636 different species shown to influence host immune responses (49,53). *A.*  
637 *fumigatus* is the main etiological agent of *Aspergillus*-related diseases and is  
638 predominantly present in the lung environment when compared to other  
639 infections caused by *Aspergillus spp.* (7). It is therefore possible that other  
640 *Aspergillus spp.*, such as *A. nidulans*, remain largely undetected in the lung

641 environment, due to the predominant nature and/or inhibitory function of other  
642 fungal species, and where they can grow without the necessity to evolve and  
643 adapt to extreme stress conditions. The prevalence and virulence of non-*A.*  
644 *fumigatus* species therefore remains a highly interesting and somewhat  
645 neglected topic that warrants future detailed studies. In summary, this is the first  
646 study that presents extensive phenotypic, metabolic, genomic and virulence  
647 characterization of two *A. nidulans* clinical isolates. Just as in *A. fumigatus*,  
648 strain heterogeneity exists in *A. nidulans* clinical strains that can define  
649 virulence traits. Further studies are required to fully characterize *A. nidulans*  
650 strain virulence traits and pathogenicity.

651

## 652 **Materials and Methods**

### 653 **Ethics statement**

654 The principles that guide our studies are based on the Declaration of  
655 Animal Rights ratified by the UNESCO on the 27<sup>th</sup> January 1978 in its 8<sup>th</sup> and  
656 14<sup>th</sup> articles. All protocols used in this study were approved by the local ethics  
657 committee for animal experiments from Universidade de São Paulo, Campus  
658 Ribeirão Preto (permit number 08.1.1277.53.6). All adult and larval zebrafish  
659 procedures were in full compliance with NIH guidelines and approved by the  
660 University of Wisconsin-Madison Institutional Animal Care and Use Committee  
661 (no. M01570 – 0-02-13).

662

### 663 **Strains, media, and growth conditions**

664 All strains used in this study are listed in Table 6. *A. nidulans* strain  
665 FGSC-A4 was used as a reference strain. In addition to culture macroscopic

666 features and fungal microscopic morphology analysis, whole genome  
667 sequencing and phylogenetic analysis confirmed that both clinical isolates are  
668 *A. nidulans* (Fig S4). For phylogenetic tree construction, we compared *CaM*,  
669 *BenA*, *RPB2* and *ITS* rDNA sequences, identified using blastN implemented in  
670 BLAST+ v2.8.1 (54), to sequences from other species in the *Aspergillus* section  
671 *Nidulantes* (55), using a maximum-likelihood tree constructed with MEGA  
672 v10.1.1 (56). All strains were maintained in 10% glycerol at -80°C.

673         Strains were grown either in complete medium or minimal medium as  
674 described previously (57). Iron-poor MM was devoid of all iron and  
675 supplemented with 200 µM of the iron chelators bathophenanthrolinedisulfonic  
676 acid (4,7-diphenyl-1,10-phenanthrolinedisulfonic acid [BPS]) and 300 µM of 3-  
677 (2-pyridyl)-5,6-bis(4-phenylsulfonic acid)-1,2,4-triazine (ferrozine). All growth  
678 was carried out at 37 °C for the indicated amounts of time, except where stated.  
679 Reagents were obtained from Sigma-Aldrich (St. Louis, MO) except where  
680 stated. Radial growth was determined by inoculating plates with 10<sup>5</sup> spores of  
681 each strain and incubation for 5 days before colony diameter was measured.  
682 Where required, the oxidative stress-inducing compound menadione or the cell  
683 wall perturbing compounds congo red (CR), caspofungin and calcofluor white  
684 (CFW) were added in increasing concentrations. All radial growth was  
685 expressed as ratios, dividing colony radial diameter (cm) of growth in the stress  
686 condition by colony radial diameter in the control (no stress) condition. To  
687 determine fungal dry weight, strains were grown from 3 x 10<sup>6</sup> spores in 30 mL  
688 liquid MM supplemented with 1% (w/v) of glucose, acetate, mucin or casamino  
689 acid or 1% (v/v) of ethanol, Tween 20 and 80 or olive oil for 48 h (glucose) or

690 72h (others) at 37 °C, 150 rpm. All liquid and solid growth experiments were  
691 carried out in biological triplicates.

692 Growth in the presence of H<sub>2</sub>O<sub>2</sub> was carried out as serial dilutions (10<sup>5</sup> –  
693 10<sup>2</sup> spores) in liquid CM in 24-well plates for 48h in the presence of different  
694 concentrations of H<sub>2</sub>O<sub>2</sub>.

695

### 696 **Metabolite analysis**

697 Metabolome analysis was performed as described previously (58).  
698 Briefly, metabolites were extracted from 5 mg of dry-frozen, mycelial powder of  
699 four biological replicates. The polar phase was dried and the derivatized sample  
700 was analyzed on a Combi-PAL autosampler (Agilent Technologies GmbH,  
701 Waldbronn, Germany) coupled to an Agilent 7890 gas chromatograph coupled  
702 to a Leco Pegasus 2 time-of-flight mass spectrometer (LECO, St. Joseph, MI,  
703 USA). Chromatograms were exported from the Leco ChromaTOF software v.  
704 3.25 to the R software ([www.r-project.org](http://www.r-project.org)). The Target Search R-package was  
705 used for peak detection, retention time alignment, and library matching.

706 Metabolites were quantified by the peak intensity of a selective mass and  
707 normalized by dividing them by the respective sample dry-weight. Principal  
708 component analysis was performed using the `pcaMethods` bioconductor  
709 package (59,60). Pathway enrichment analysis was carried out using  
710 MetaboAnalyst (<http://www.metaboanalyst.ca/MetaboAnalyst/faces/home.xhtml>)  
711 (61).

712

713

714

715 **Determination of minimal inhibitory concentrations (MICs)**

716 MICs of amphotericin B, voriconazole and posaconazole, were  
717 determined by growing  $10^4$  spores/well in 96-well plates containing 200  $\mu$ l/well  
718 of RPMI and increasing concentrations of the aforementioned compounds,  
719 according to the M38 3<sup>rd</sup> edition protocol elaborated by the Clinical and  
720 Laboratory Standards Institute (62).

721

722 **Induction of cleistothecia formation**

723 Cleistothecia formation through self-crossing was induced by growing the  
724 strains on glucose minimal medium (GMM) plates that were sealed airtight and  
725 incubated for 14 days at 30 or 37°C. Plates were scanned for the presence of  
726 cleistothecia under a light microscope. To assess ascospore viability, five  
727 cleistothecia of each strain were collected, cleaned on 4% w/v agar plates and  
728 re-suspended in 100  $\mu$ l water. Ascospores were counted and 100 ascospores  
729 were plated on GMM before colony-forming units (CFU) were determined.  
730 Cleistothecia density was determined through counting the number of  
731 cleistothecia of a certain area and dividing them by the  $\text{cm}^2$  of the area.

732 Cleistothecia formation through out-crossing was carried out as  
733 described previously (57). To induce *pyrG* auxotrophy in strains MO80069 and  
734 SP-2605-48 (Table 1), they were grown on GMM plates supplemented with 1.2  
735 g/L uridine and uracil (UU) and 0.75 mg/mL 5-fluoroorotic acid (FOA) in the form  
736 of a cross until single colonies appeared. Auxotrophy was confirmed by growing  
737 strains on GMM with and without UU before strains were crossed with strain  
738 R21XR135 (Table 1).

739

740 **DNA extraction, genome sequence, detection of single nucleotide**  
741 **polymorphisms (SNPs), insertions and deletions (Indels).**

742 DNA was extracted as described previously (57). Genomes were  
743 sequenced using 150-bp Illumina paired-end sequence reads at the Genomic  
744 Services Lab of Hudson Alpha (Huntsville, Alabama, USA). Genomic libraries  
745 were constructed with the Illumina TruSeq library kit and sequenced on an  
746 Illumina HiSeq 2500 sequencer. Samples were sequenced at greater than 180X  
747 coverage or depth. Short-read sequences for these strains are available in the  
748 NCBI Sequence Read Archive (SRA) under accession number.

749 The Illumina reads were processed with the BBDuk and Tadpole  
750 programs of BBDuk release 37.34  
751 [[https://sourceforge.net/projects/bbmap/files/BBMap\\_37.34.tar.gz/download](https://sourceforge.net/projects/bbmap/files/BBMap_37.34.tar.gz/download)] to  
752 remove sequencing adapters and phiX, and to correct read errors. The  
753 *Aspergillus nidulans* FGSC\_A4 genome sequence and gene predictions,  
754 version s10-m04-r15, were obtained from the Aspergillus Genome Database  
755 [<http://aspgd.org/>]. The processed DNA reads were mapped to the FGSC\_A4  
756 genome with minimap2 version 2.17 [<https://github.com/lh3/minimap2>] and  
757 variants from the FGSC\_A4 sequence were called with Pilon version 1.23  
758 [<https://github.com/broadinstitute/pilon>]. Short indels and nucleotide  
759 polymorphisms were recovered from the Pilon VCF files by filtering with vcfFilter  
760 [<https://github.com/vcflib/vcflib>] to retain only calls with read coverage deeper  
761 than 7, exactly one alternative allele, and alternative allele fraction at least 0.8.  
762 Longer indels and sequence polymorphisms were recovered by searching the  
763 VCF files for the SVTYPE keyword. Sequence variations inside predicted genes  
764 and their effects on predicted protein sequence were identified with a custom

765 Python script. The mitochondrial genome was obtained from the discarded  
766 contigs of MaSuRCA. Due to its circular nature, the mitochondrial genome  
767 appeared repeated multiple times in a single contig. Lastal  
768 (<http://last.cbrc.jp/doc/last.html>) was used to extract one single copy of the  
769 mitochondrial genome using the reference mitochondrion.

770

### 771 **Detection of large genome deletions and insertions**

772 Genome assemblies of the two clinical isolates were aligned to the FGSC  
773 A4 reference genome with nucmer (Kurtz et al., 2004). The alignments were  
774 filtered to keep only one-to-one matches. Strain-specific loci were detected by  
775 searching the alignment coordinates table for regions of the A4 genome with no  
776 match in the clinical isolate genome. Large insertions were detected by  
777 searching the alignment coordinates table for regions of the clinical isolate  
778 genomes with no match in the A4 genome.

779

### 780 **Identification of transposon-like regions in the FGSC-A4 reference** 781 **genome**

782 Transposon-like regions were identified by running Pfam (64) on the six  
783 translation frames of the complete genome sequence. Regions containing any  
784 of the fourteen domains typically known to be associated with transposable  
785 elements (Table S1) were collected. Inverted repeats longer than 50 bp and  
786 separated by less than 5000 bp were extracted and marked as potential  
787 Miniature Inverted-repeat Transposable elements (MITE). The Pfam and MITE  
788 locations were combined to form the transposon track.

789



790 **Figure generation**

791 DNAPlotter (65) was used to display the loci of all non-synonymous  
792 SNPs and large deletions identified in the two clinical strains when compared to  
793 the reference genome of FGSC A4. In addition, the locations of transposon-like  
794 regions in the A4 genome are also highlighted using DNAPlotter.

795

796 **Western blotting**

797 Strains were grown from  $1 \times 10^7$  spores at 37 °C, 200 rpm, in 50 ml CM for  
798 16 h before being exposed to 0.5 M NaCl for 0, 10 and 30 min. Total cellular  
799 proteins were extracted according to Fortwendel and colleagues (2010)(66) and  
800 quantified according to Hartree and colleagues (1972) (67).

801 For each sample, 60 µg of total intracellular protein were run on a 12%  
802 (w/v) SDS-PAGE gel before they were transferred to a polyvinylidene difluoride  
803 (PVDF) membrane (GE Healthcare). Phosphorylated MpkA or total MpkA was  
804 probed for by incubating the membrane with a 1:5000 dilution of the anti-  
805 phospho-p44/42 MAPK (9101; Cell Signaling Technologies) antibody or with a  
806 1:5000 dilution of the p44-42 MAPK (Cell Signaling Technology) antibody  
807 overnight at 4 °C with shaking. Subsequently, membranes were washed 3 x  
808 with TBS-T (2.423 g/l Tris, 8 g/L NaCl, 1 ml /l Tween 20), incubated with a  
809 1:5000 dilution of an anti-rabbit IgG horseradish peroxidase (HRP) antibody #  
810 7074 (Cell Signaling Technologies) for 1 h at room temperature. MpkA was  
811 detected by chemoluminescence using the Western ECL Prime (GE  
812 Healthcare) blot detection kit according to the manufacturer's instructions. Films  
813 were submitted to densitometric analysis using the ImageJ software  
814 (<http://rsbweb.nih.gov/ij/index.html>). The amount of phosphorylated MpkA was

815 normalized by total MpkA. The *A. fumigatus*  $\Delta mpka$  strain was used as a  
816 negative control (Table 1) (68).

817

### 818 **Isolation and differentiation of bone marrow-derived murine macrophages**

819 Bone marrow-derived macrophages (BMDMs) were isolated as  
820 described previously (69). Briefly, BMDMs were recovered from femurs of  
821 C57BL/6 wild-type and *gp91<sup>phox</sup>* knockout mice and were incubated in BMDM  
822 medium [RPMI medium (Gibco) supplemented with 30% (v/v) L929 growth  
823 conditioning media, 20% inactivated fetal bovine serum (FBS) (Gibco), 2 mM  
824 glutamine and 100 units/mL of penicillin-streptomycin (Life Technologies)]. After  
825 4 days, fresh media was added for an additional 3 days before BMDMs were  
826 collected.

827

828

### 829 ***In vitro* phagocytosis and killing assays**

830 Phagocytosis and killing assays of *A. nidulans* conidia by wild-type and  
831 *gp91<sup>phox</sup>* knockout macrophages were carried out according to Bom et al. (2015)  
832 (70) with modifications. 24-well plates containing a 15-mm-diameter coverslip in  
833 each well (phagocytosis assay) or without any coverslip (killing assay) and 2 x  
834 10<sup>5</sup> macrophages per well were incubated in 1 ml of RPMI-FBS [(RPMI medium  
835 (Gibco) supplemented with 10% inactivated fetal bovine serum (FBS) (Gibco), 2  
836 mM glutamine and 100 units/mL of penicillin-streptomycin (Life Technologies)]  
837 at 37 °C, 5% CO<sub>2</sub> for 24 h. Wells were washed with 1 ml of PBS before the  
838 same volume of RPMI-FBS medium supplemented with 1 x 10<sup>6</sup> conidia (1:5  
839 macrophage/conidium ratio) was added in the same conditions.

840 To determine phagocytosis, macrophages were incubated with conidia  
841 for 1.5 h before the supernatant was removed and 500  $\mu$ l of PBS containing  
842 3.7% formaldehyde was added for 15 min at room temperature (RT). Sample  
843 coverslips were washed with 1 ml of ultrapure water and incubated for 20 min  
844 with 500  $\mu$ l of 0.1 mg/ml CFW (calcufluor white) to stain for the cell wall of non-  
845 phagocytised conidia. Samples were washed and coverslips were viewed under  
846 a Zeiss Observer Z1 fluorescence microscope. In total, 100 conidia were  
847 counted per sample and the phagocytosis index was calculated. Experiments  
848 were performed in biological triplicates.

849 To determine macrophage-induced killing of conidia, macrophages were  
850 incubated with conidia for 1.5 h before cell culture supernatants were collected  
851 and cytokine concentrations were determined. Macrophages were then washed  
852 twice with PBS to remove all non-adherent cells and subsequently lysed with  
853 250  $\mu$ L of 3% v/v Triton X-100 for 10 min at RT. Serial dilutions of lysed  
854 samples were performed in sterile PBS and plated onto CM and incubated at 37  
855  $^{\circ}$ C for 2 days, before colony forming units (CFU) were determined.

856

### 857 **Polymorphonuclear (PMN) cell isolation and spore germination assay**

858 Human PMN cells from fresh venous blood of healthy adult volunteers  
859 were isolated according to Drewniak et al. (2013) (71), with modifications. Cells  
860 were harvested by centrifugation in isotonic Percoll, lysed, and re-suspended in  
861 4-(2-hydroxyethyl)-1-piperazineethanesulfonic acid-buffered saline solution. *A.*  
862 *nidulans* asexual spores were incubated with PMN cells ( $1 \times 10^5$  cells/mL;  
863 effector: 1:500) in a 96-well plate overnight at 37  $^{\circ}$ C in RPMI 1640 medium  
864 containing glutamine and 10% fetal calf serum (Life). PMN cells were lysed in a

865 water and a sodium hydroxide (pH 11.0) solution (Sigma-Aldrich) and spore  
866 germination was determined using an MTT (thiazolyl blue; Sigma-Aldrich)  
867 assay, according to Dos Reis et al., (2011). Strain viability was calculated  
868 relative to incubation without PMN cells, which was set at 100% for each  
869 sample. The viability of *A. nidulans* germinated spores in the presence of PMN  
870 cells, was determined as described previously (32).

871

872 ***In vivo* immunocompetent, CGD (chronic granulomatous disease) and**  
873 **neutrophilic zebrafish infections**

874 We evaluated strain virulence in an established zebrafish-aspergillosis  
875 model (72 Wild-type larvae were used as an immunocompetent model. Larvae  
876 with a dominant negative Rac2D57N mutation in neutrophils (*mpx:rac2D57N*)  
877 (Rosowski et al., 2017) were used as a model of leukocyte adhesion deficiency,  
878 where neutrophils do not reach the site of infection, and *p22<sup>phox</sup>*-deficient larvae  
879 (*p22<sup>phox</sup> (sa11798)*) were used as a CGD model (21).

880 Spore preparation and conidium micro-injection into the hindbrain of 2-  
881 days post fertilization (dpf) larvae were performed as previously described (72).  
882 Briefly, after manual dechoriation of embryos, 3 nL of inoculum or PBS-  
883 control were injected into the hindbrain ventricle via the optic vesicle (~50  
884 conidia) in anesthetized larvae at approximately 36 h post fertilization.

885

886 ***In vivo* immunocompetent, CGD (chronic granulomatous disease) and**  
887 **neutropenic murine infections**

888 Virulence of the *A. nidulans* strains was determined in  
889 immunocompetent, CGD and neutropenic mice. *A. nidulans* conidial  
890 suspensions were prepared and viability experiments carried out as described  
891 previously (70). Eight to twelve weeks old wild-type (n=10) and *gp91<sup>phox</sup>*  
892 *knockout* (n=7) C57BL/6 male mice were used as immunocompetent and CGD

893 models, respectively. Neutropenia was induced in 7-8 weeks old BALB/c female  
894 mice (n=10, weighing between 20 and 22 g) with cyclophosphamide at a  
895 concentration of 150 mg per kg, administered intraperitoneally (i.p) on days -4  
896 and -1 prior to infection (day 0) and 2 days post-infection. Hydrocortisone  
897 acetate (200 mg/kg) was injected subcutaneously on day -3 prior to infection.

898 Mice were anesthetized and submitted to intratracheal (i.t.) infection as  
899 previously described (73) with some minor modifications. Briefly, after i.p.  
900 injection of ketamine and xylazine, animals were infected with  $5.0 \times 10^7$   
901 (immunocompetent) or  $1 \times 10^6$  (CGD) conidia contained in 75  $\mu$ L of PBS (74) by  
902 surgical i.t. (intratracheal) inoculation, which allowed dispensing of the fungal  
903 conidia directly into the lungs. Neutropenic mice were infected by intranasal  
904 instillation of  $1.0 \times 10^4$  conidia as described previously (70). PBS (phosphate  
905 buffered saline) was administered as a negative control for each murine model.

906 Mice were weighed every 24 h from the day of infection and visually  
907 inspected twice daily. The endpoint for survival experimentation was identified  
908 when a 20% reduction in body weight was recorded, at which time the mice  
909 were sacrificed.

910

## 911 **Statistical analyses**

912 All statistical analyses were performed using GraphPad Prism version  
913 7.00 (GraphPad Software, San Diego, CA, USA), with  $P < 0.05$  considered  
914 significantly different. A two-way analysis of variance (ANOVA) was carried out  
915 on all stress response tests; whereas a one-way ANOVA with Tukey post-test  
916 was applied for growth in the presence of different carbon sources,  
917 phagocytosis index and PMN cell killing assay. Survival curves were plotted by

918 Kaplan-Meier analysis and results were analyzed using the log rank test. All  
919 experiments were repeated at least twice.

920

921

## 922 **Acknowledgements**

923 We would like to thank the Fundação de Amparo à Pesquisa do Estado  
924 de São Paulo (FAPESP, São Paulo research foundation), grant numbers  
925 2016/07870-9, 2017/19821-5, LNAR 2017/14159-2, FVL 2018/14762-3 and  
926 2019/00631-7 and the Conselho Nacional de Desenvolvimento Científico e  
927 Tecnológico (CNPq) for financial support. JLS and AR were supported by the  
928 Howard Hughes Medical Institute through the James H. Gilliam Fellowships for  
929 Advanced Study program. FR was supported by the Northern Portugal Regional  
930 Operational Programme (NORTE 2020), under the Portugal 2020 Partnership  
931 Agreement, through the European Regional Development Fund (FEDER)  
932 (NORTE-01-0145-FEDER-000013).

933 We also thank Dra. Danielle da Glória de Souza (UFMG-Brazil) for  
934 helping with *gp91<sup>phox</sup> knockout* C57BL/6 mice.

935 The funders had no role in study design, data collection and  
936 interpretation, or the decision to submit the work for publication.

937

## 938 **References**

- 939 1. Brown GD, Denning DW, Gow NA, Levitz SM, Netea MG, White, TC.  
940 2012. Hidden killers: human fungal infections. *Sci. Transl Med* 4,165rv13.  
941 4. [https://doi: 10.1126/scitranslmed.3004404](https://doi:10.1126/scitranslmed.3004404).

- 942 2. Bongomin F, Smith RM, Park BJ, Jarvis JN, Govender NP, Chiller TM,  
943 Denning DW, Loyse A, Boulware DR. 2017. Global and multinational  
944 prevalence of fungal diseases-estimate precision. J Fungi 3:57. [https://](https://doi.org/10.3390/jof3040057)  
945 doi: 10.3390/jof3040057.
- 946 3. Almeida F, Rodrigues ML, Coelho C. 2019. The still underestimated  
947 problem of fungal diseases worldwide. Front Microbiol 10: 214. [https://](https://doi.org/10.3389/fmicb.2019.00214)  
948 doi: 10.3389/fmicb.2019.00214
- 949 4. Brown GD, Denning DW, Levitz SM. 2012. Tackling human fungal  
950 infections. Science 336, 647. [https:// doi: 10.1126/science.1222236](https://doi.org/10.1126/science.1222236).
- 951 5. Tufa TB, Denning DW. 2019. The Burden of fungal infections in Ethiopia.  
952 J Fungi (Basel) 5(4). pii: E109. [https:// doi: 10.3390/jof5040109](https://doi.org/10.3390/jof5040109).
- 953 6. Paulussen C, Hallsworth JE, Álvarez-Pérez S, Nierman WC, Hamill PG,  
954 Blain D, Rediers H, Lievens B. 2017. Ecology of aspergillosis: insights  
955 into the pathogenic potency of *Aspergillus fumigatus* and some other  
956 *Aspergillus* species. Microb Biotechnol 102:296–322. [https:// doi:](https://doi.org/10.1111/1751-7915.12367)  
957 10.1111/1751-7915.12367.
- 958 7. Zakaria A, Osman M, Dabboussi F, Rafei R, Mallat H, Papon N,  
959 Bouchara JP, Hamze M. 2020. Recent trends in the epidemiology,  
960 diagnosis, treatment, and mechanisms of resistance in clinical  
961 *Aspergillus* species: A general review with a special focus on the Middle  
962 Eastern and North African region. J Infect Public Health 13:1–10. [https://](https://doi.org/10.1016/j.jiph.2019.08.007)  
963 doi: 10.1016/j.jiph.2019.08.007.
- 964 8. Philippe B, Ibrahim-Granet O, Prévost MC, Gougerot-Pocidalò MA,  
965 Sanchez Perez M, Van der Meeren A, Latgé JP. 2003. Killing of  
966 *Aspergillus fumigatus* by alveolar macrophages is mediated by reactive

- 967 oxidant intermediates. *Infect Immun* 71:3034–3042. [https:// doi:](https://doi.org/10.1128/IAI.71.6.3034-3042.2003)  
968 10.1128/IAI.71.6.3034-3042.2003.
- 969 9. Bonnett CR, Cornish EJ, Harmsen AG, Burritt J.B. 2006. Early neutrophil  
970 recruitment and aggregation in the murine lung inhibit germination of  
971 *Aspergillus fumigatus* conidia. *Infect Immun* 74:6528-6539. [https://](https://doi.org/10.1128/IAI.74.11.6528-6539.2006)  
972 10.1128/IAI.74.11.6528-6539.2006.
- 973 10. Latgé JP, Chamilos G. 2019. *Aspergillus fumigatus* and aspergillosis in  
974 2019. *Clin Microbiol Rev* 33:e00140-18. [https:// doi:](https://doi.org/10.1128/CMR.00140-18)  
975 10.1128/CMR.00140-18.
- 976 11. Kanj A, Abdallah N, Soubani AO. 2018. The spectrum of pulmonary  
977 aspergillosis. *Respir Med* 141:121–131. [https:// doi:](https://doi.org/10.1016/j.rmed.2018.06.029)  
978 10.1016/j.rmed.2018.06.029.
- 979 12. Segal BH, Leto TL, Gallin JI, Malech HL, Holland SM. 2000. Genetic,  
980 biochemical, and clinical features of chronic granulomatous disease.  
981 *Medicine* 79:170–200.
- 982 13. Segal BH, Holland SM. 2000. Primary phagocytic disorders of childhood.  
983 *Pediatr Clin North Am* 47:1311–1338.
- 984 14. Ross D. 2016. Chronic granulomatous disease. *British Medical Bulletin*  
985 118:53-66. [https:// doi: 10.1093/bmb/ldw009](https://doi.org/10.1093/bmb/ldw009).
- 986 15. Henriët SS, Verweij PE, Warris A. 2012. *Aspergillus nidulans* and chronic  
987 granulomatous disease: a unique host-pathogen interaction. *J Infect Dis*  
988 206:1128–1137. [https:// doi: 10.1093/infdis/jis473](https://doi.org/10.1093/infdis/jis473).
- 989 16. Henriët SS, Verweij PE, Holland SM, Warris A. 2013. Invasive fungal  
990 infections in patients with Chronic Granulomatous Disease. In: Curtis N,  
Finn A, Pollard A. (eds). *Hot Topics in Infection and Immunity in Children*



- 991 IX. Advances in Experimental Medicine and Biology. Springer, New York,  
992 NY.
- 993 17. Segal BH, Romani LR. 2009. Invasive aspergillosis in chronic  
994 granulomatous disease. *Med Mycol* 47 Suppl 1:S282-90. [https:// doi:](https://doi.org/10.1080/13693780902736620)  
995 [10.1080/13693780902736620](https://doi.org/10.1080/13693780902736620).
- 996 18. Tavakoli M, Rivero-Menendez O, Abastabar M, Hedayati MT, Sabino R,  
997 Siopi M, Zarrinfar H, Nouripour-Sisakht S, van der Lee H, Valadan R,  
998 Meletiadis J, Yazdani Charati J, Seyedmousavi S, Alastruey-Izquierdo A.  
999 Genetic diversity and antifungal susceptibility patterns of *Aspergillus*  
1000 *nidulans* complex obtained from clinical and environmental sources.  
1001 2020. *Mycoses* 63:78–88. [https:// doi: 10.1111/myc.13019](https://doi.org/10.1111/myc.13019).
- 1002 19. Chang YC, Segal BH, Holland SM, Miller GF, Kwon-Chung KJ. 1998.  
1003 Virulence of catalase-deficient aspergillus nidulans in p47(phox)<sup>-/-</sup> mice.  
1004 Implications for fungal pathogenicity and host defense in chronic  
1005 granulomatous disease. *J Clin Invest* 101:1843–1850.  
1006 [doi:10.1172/JCI2301](https://doi.org/10.1172/JCI2301).
- 1007 20. Henriet SS, Hermans PW, Verweij PE, Simonetti E, Holland SM, Sugui  
1008 JA, Kwon-Chung KJ, Warris A. 2011. Human leukocytes kill *Aspergillus*  
1009 *nidulans* by reactive oxygen species-independent mechanisms. *Infect*  
1010 *Immun* 79:767–773. [https:// doi: 10.1128/IAI.00921-10](https://doi.org/10.1128/IAI.00921-10).
- 1011 21. Schoen TJ, Rosowski EE, Knox BP, Bennin D, Keller NP, Huttenlocher  
1012 A. 2019. Neutrophil phagocyte oxidase activity controls invasive fungal  
1013 growth and inflammation in zebrafish. *J Cell Sci* pii: jcs.236539. [https://](https://doi.org/10.1242/jcs.236539)  
1014 [doi: 10.1242/jcs.236539](https://doi.org/10.1242/jcs.236539).

- 1015 22. Beattie SR, Mark KMK, Thammahong A, Ries LNA, Dhingra S, Caffrey-  
1016 Carr AK, Cheng C, Black CC, Bowyer P, Bromley MJ, Obar JJ, Goldman  
1017 GH, Cramer RA. 2017. Filamentous fungal carbon catabolite repression  
1018 supports metabolic plasticity and stress responses essential for disease  
1019 progression. *PLoS Pathog* 13(4): e1006340. [https:// doi:  
1020 10.1371/journal.ppat.1006340.](https://doi.org/10.1371/journal.ppat.1006340)
- 1021 23. Grahl N, Puttikamonkul S, Macdonald JM, Gamcsik MP, Ngo LY, Hohl  
1022 TM, Cramer RA. 2011. *In vivo* Hypoxia and a fungal alcohol  
1023 dehydrogenase influence the pathogenesis of invasive pulmonary  
1024 aspergillosis. *Plos Pathog* 7: e1002145. [https://  
1025 doi:10.1371/journal.ppat.1002145](https://doi.org/10.1371/journal.ppat.1002145)
- 1026 24. Ries LNA, Steenwyk JL, de Castro PA, de Lima PBA, Almeida F, de  
1027 Assis LJ, Manfiolli AO, Takahashi-Nakaguchi A, Kusuya Y, Hagiwara D,  
1028 Takahashi H, Wang X, Obar JJ, Rokas A, Goldman GH. 2019. Nutritional  
1029 heterogeneity among *Aspergillus fumigatus* strains has consequences  
1030 for virulence in a strain- and host-dependent manner. *Front Microbiol*  
1031 10:854. [https:// doi: 10.3389/fmicb.2019.00854.](https://doi.org/10.3389/fmicb.2019.00854)
- 1032 25. Olivas I, Royuela M, Romero B, Monteiro MC, Minguez JM, Laborda F,  
1033 De Lucas JR. 2008. Ability to grow on lipids accounts for the fully virulent  
1034 phenotype in neutropenic mice of *Aspergillus fumigatus* null mutants in  
1035 the key glyoxylate cycle enzymes. *Fungal Genet Biol* 45:45–60.
- 1036 26. Hynes MJ, Murray SL, Duncan A, Khew GS, Davis MA. 2006. Regulatory  
1037 genes controlling fatty acid catabolism and peroxisomal functions in the  
1038 filamentous fungus *Aspergillus nidulans*. *Eukaryot Cell* 5:794–805.

- 1039 27. Boskou D. 1996. Olive oil composition. Boskou, D. eds. Olive Oil:  
1040 Chemistry and Technology 1996:52–83 AOCS Press Champaign, IL.
- 1041 28. Clavaud C, Beauvais A, Barbin L, Munier-Lehmann H, Latgé J-P. 2012.  
1042 The composition of the culture medium influences the  $\beta$ -1,3-glucan  
1043 metabolism of *Aspergillus fumigatus* and the anjpeungal activity of  
1044 inhibitors of  $\beta$ -1,3-glucan synthesis. Antimicrob Agents Chemother  
1045 56:3428–3431. [https:// doi: 10.1128/AAC.05661-11](https://doi.org/10.1128/AAC.05661-11).
- 1046 29. Ene IV, Cheng SC, Netea, MG, Brown AJ. 2013. Growth of *Candida*  
1047 *albicans* cells on the physiologically relevant carbon source lactate  
1048 affects their recognition and phagocytosis by immune cells. Infect Immun  
1049 81:238–248. [https:// doi: 10.1128/IAI.01092-12](https://doi.org/10.1128/IAI.01092-12)
- 1050 30. Abad A, Fernández-Molina JV, Bikandi J, Ramírez A, Margareto J,  
1051 Sendino J, Hernando FL, Pontón J, Garaizar J, Rementeria A. 2010.  
1052 What makes *Aspergillus fumigatus* a successful pathogen? Genes and  
1053 molecules involved in invasive aspergillosis. Rev Iberoam Micol 27:155–  
1054 182. [https:// doi: 10.1016/j.riam.2010.10.003](https://doi.org/10.1016/j.riam.2010.10.003). [https://](https://doi.org/10.1016/j.riam.2010.10.003)
- 1055 31. De Assis LJ, Ulas M, Ries LNA, El Ramli NAM, Sarikaya-Bayram O,  
1056 Braus GH, Bayram O, Goldman GH. 2018. Regulation of *Aspergillus*  
1057 *nidulans* CreA-mediated catabolite repression by the F-box proteins  
1058 Fbx23 and Fbx47. mBio 9:e00840-18. [https:// doi: 10.1128/mBio.00840-](https://doi.org/10.1128/mBio.00840-18)  
1059 18. [https:// doi: 10.1128/mBio.00840-18](https://doi.org/10.1128/mBio.00840-18).
- 1060 32. Gazendam RP, van Hamme JL, Tool AT, Hoogenboezem M, van den  
1061 Berg JM, Prins JM, Vitkov L, van de Veerdonk FL, van den Berg TK,  
1062 Roos D, Kuijpers TW. 2016. Human neutrophils use different  
1063 mechanisms to kill *Aspergillus fumigatus* conidia and hyphae: evidence

- 1064 from phagocyte defects. *J Immunol* 196:1272–1283. [https:// doi:](https://doi.org/10.4049/jimmunol.1501811)  
1065 10.4049/jimmunol.1501811.
- 1066 33.Aruanno M, Glampedakis E, Lamoth F. 2019. Echinocandins for the  
1067 treatment of invasive aspergillosis: from laboratory to bedside.  
1068 *Antimicrob Agents Chemother* 63(8). pii: e00399-19. [https:// doi:](https://doi.org/10.1128/AAC.00399-19)  
1069 10.1128/AAC.00399-19.
- 1070 34.Kopecka M, Gabriel M. 1992. The influence of congo red on the cell wall  
1071 and (1----3)-beta-D-glucan microfibril biogenesis in *Saccharomyces*  
1072 *cerevisiae*. *Arch Microbiol* 158:115–126.
- 1073 35.Roncero C, Duran A. 1985. Effect of Calcofluor white and Congo red on  
1074 fungal wall morphogenesis: in vivo activation of chitin polymerization. *J.*  
1075 *Bacteriol* 163:1180–1185.
- 1076 36.Pontecorvo G, Rope, JA, Hemmons LM, Macdonald KD, Bufton AW.  
1077 1953. The genetics of *Aspergillus nidulans*. *Adv Genet* 5:141–238.
- 1078 37.Kowalski CH, Beattie SR, Fuller KK, McGurk EA, Tang YW, Hohl TM,  
1079 Obar JJ, Cramer RA Jr. 2016. Heterogeneity among isolates reveals that  
1080 fitness in low oxygen correlates with *Aspergillus fumigatus* virulence.  
1081 *mBio* 7:e01515-16. [https:// doi: 10.1128/mBio.01515-16](https://doi.org/10.1128/mBio.01515-16).
- 1082 38.Knox BP, Blachowicz A, Palmer JM, Romsdahl J, Huttenlocher A, Wang  
1083 CC, Keller NP, Venkateswaran K. 2016. Characterization of *Aspergillus*  
1084 *fumigatus* isolates from air and surfaces of the international space  
1085 station. *mSphere* 1:e00227-16.
- 1086 39.Rosowski EE, Raffa N, Knox BP, Golenberg N, Keller NP, Huttenlocher  
1087 A. 2017. Macrophages inhibit *Aspergillus fumigatus* germination and

- 1088 neutrophil-mediated fungal killing. PLoS Pathog 14: e1007229. [https://](https://doi.org/10.1371/journal.ppat.1007229)  
1089 doi: 10.1371/journal.ppat.1007229.
- 1090 40. Flipphi M, Oestreicher N, Nicolas V, Guitton A, Velot C. 2014. The  
1091 *Aspergillus nidulans acuL* gene encodes a mitochondrial carrier required  
1092 for the utilization of carbon sources that are metabolized via the TCA  
1093 cycle. Fungal Genet Biol 68:9-22. [https:// doi: 10.1016/j.fgb.2014.04.012](https://doi.org/10.1016/j.fgb.2014.04.012).
- 1094 41. Vienken K, Scherer M, Fischer R. 2005. The Zn(II)<sub>2</sub>Cys<sub>6</sub> putative  
1095 *Aspergillus nidulans* transcription factor repressor of sexual development  
1096 inhibits sexual development under low- carbon conditions and in  
1097 submersed culture. Genetics 169: 619–630.
- 1098 42. Valiante V, Macheleidt J, Föge M and Brakhage AA. 2015. The  
1099 *Aspergillus fumigatus* cell wall integrity signaling pathway: drug target,  
1100 compensatory pathways, and virulence. Front Microbiol 6:325. [https://](https://doi.org/10.3389/fmicb.2015.00325)  
1101 doi: 10.3389/fmicb.2015.00325.
- 1102 43. Rocha MC, Fabri J, de Godoy KF, de Castro PA, Hori JI, da Cunha AF,  
1103 Arentshorst M, Ram AFJ, van den Hondel C, Goldman GH, Malavazi I.  
1104 2016. *Aspergillus fumigatus* MADS-box transcription factor rlmA is  
1105 required for regulation of the cell wall integrity and virulence. G3  
1106 (Bethesda)v6:2983–3002. [https:// doi: 10.1534/g3.116.031112](https://doi.org/10.1534/g3.116.031112).
- 1107 44. Verweij PE, Varga J, Houbraeken J, Rijs AJ, Verduynlunel FM, Blijlevens  
1108 NM, Shea YR, Holland SM, Warris A, Melchers WJ, Samson RA. 2008.  
1109 *Emericella quadrilineata* as cause of invasive aspergillosis. Emerg Infect  
1110 Dis 14:566–572. [https:// doi: 10.3201/eid1404.071157](https://doi.org/10.3201/eid1404.071157)

- 1111 45. Dotis J, Roilides E. 2004. Osteomyelitis due to *Aspergillus* spp. in  
1112 patients with chronic granulomatous disease: comparison of *Aspergillus*  
1113 *nidulans* and *Aspergillus fumigatus*. *Int J Infect Dis* 8:103-110.
- 1114 46. Henriët SS, van de Sande WW, Lee MJ, Simonetti E, Momany M,  
1115 Verweij PE, Rijs AJ, Ferwerda G, Sheppard DC, de Jonge MI, Warris A1.  
1116 2016. Decreased cell wall galactosaminogalactan in *Aspergillus nidulans*  
1117 mediates dysregulated inflammation in the chronic granulomatous  
1118 disease host. *J Interferon Cytokine Res.* 2016. 488–498. doi:  
1119 10.1089/jir.2015.0095.
- 1120 47. Caffrey-Carr AK, Kowalski CH, Beattie SR, Blaseg NA., Upshaw CR,  
1121 Thammahong A, Lust HE, Tang YW, Hohl TM, Cramer RA, Obar JJ.  
1122 2017. Interleukin 1 $\alpha$  is critical for resistance against highly virulent  
1123 *Aspergillus fumigatus* isolates. *Infect Immun* 85:e00661-17. [https:// doi:](https://doi.org/10.1128/IAI.00661-17)  
1124 10.1128/IAI.00661-17.
- 1125 48. Fourie R, Ells R, Swart CW, Sebolai OM, Albertyn J and Pohl CH. 2016.  
1126 *Candida albicans* and *Pseudomonas aeruginosa*. interaction, with focus  
1127 on the role of eicosanoids. *Front Physiol* 7:64. [https:// doi:](https://doi.org/10.3389/fphys.2016.00064)  
1128 10.3389/fphys.2016.00064.
- 1129 49. Ojeda-López M, Chen W, Eagle CE, Gutiérrez G, Jia WL, Swilaiman SS,  
1130 Huang Z, Park HS, Yu JH, Cánovas D, Dyer PS. 2019. Evolution of  
1131 asexual and sexual reproduction in the aspergilli. *Studies in Mycology*  
1132 91:37–59. [https:// doi: 10.1016/j.simyco.2018.10.002](https://doi.org/10.1016/j.simyco.2018.10.002)
- 1133 50. Dyer PS, O'Gorman CM. 2012. Sexual development and cryptic sexuality  
1134 in fungi: insights from *Aspergillus* species. *FEMS Microbiol Rev* 36:165–  
1135 192. [https://](https://doi.org/10.1111/j.1365-3113.2012.00501.x)

- 1136 51.Fuller KK., Cramer RA., Zegans ME, Dunlap JC, Loros JJ. 2016.  
1137 *Aspergillus fumigatus* photobiology illuminates the marked heterogeneity  
1138 between isolates. mBio 7:e01517-16. [https:// doi: 10.1111/j.1574-](https://doi.org/10.1111/j.1574-6976.2011.00308.x)  
1139 6976.2011.00308.x.
- 1140 52.Kosmidis C, Denning DW. 2015. The clinical spectrum of pulmonary  
1141 aspergillosis. Thorax 70:270277. [https:// doi: 10.1136/thoraxjnl-2014-](https://doi.org/10.1136/thoraxjnl-2014-206291)  
1142 206291.
- 1143 53.O'Dwyer DN, Dickson RP, Moore BB. 2016. The lung microbiome,  
1144 immunity, and the pathogenesis of chronic lung disease. J Immunol  
1145 196:4839–4847. [https:// 10.4049/jimmunol.1600279](https://doi.org/10.4049/jimmunol.1600279).
- 1146 54.Camacho C, Coulouris G, Avagyan V, Ma N, Papadopoulos J, Bealer K,  
1147 Madden TL. 2009. BLAST+: architecture and applications. BMC  
1148 bioinformatics 10(1), 421. [https:// doi: 10.1186/1471-2105-10-421](https://doi.org/10.1186/1471-2105-10-421).
- 1149 55.Chen AJ, Frisvad JC, Sun BD, Varga J, Kocsubé S, Dijksterhuis J, Kim  
1150 DH, Hong SB, Houbraken J, Samson RA. 2016. *Aspergillus* section  
1151 Nidulantes (formerly *Emericella*): Polyphasic taxonomy, chemistry and  
1152 biology. Stud Mycol 84:1–118. [https:// doi: 10.1016/j.simyco.2016.10.001](https://doi.org/10.1016/j.simyco.2016.10.001).
- 1153 56.Kumar S, Stecher G, Li M, Knyaz C,Tamura K. 2018. MEGA X:  
1154 Molecular Evolutionary Genetics Analysis across computing platforms.  
1155 Mol Bio Evol 35:1547–1549. [https:// doi: 10.1093/molbev/msy096](https://doi.org/10.1093/molbev/msy096).
- 1156 57.Ries LNA, Beattie SR, Espeso EA, Cramer RA, Goldman GH. 2016.  
1157 Diverse regulation of the CreA carbon catabolite repressor in *Aspergillus*  
1158 *nidulans*. Genetics 203:335–352. [https:// doi:](https://doi.org/10.1534/genetics.116.187872)  
1159 10.1534/genetics.116.187872.

- 1160 58. Ries LNA, José de Assis L, Rodrigues FJS, Caldana C, Rocha MC,  
1161 Malavazi I, Bayram Ö, Goldman GH. 2018. The *Aspergillus nidulans*  
1162 pyruvate dehydrogenase kinases are essential to integrate carbon  
1163 source metabolism. *G3* (Bethesda) 8:2445–2463. [https:// doi:](https://doi.org/10.1534/g3.118.200411)  
1164 10.1534/g3.118.200411.
- 1165 59. Stacklie WH, Redestig H, Scholz M, Walther D, Selbig J. 2007.  
1166 *pcaMethods*—a bioconductor package providing PCA methods for  
1167 incomplete data. *Bioinformatics* 23:1164–1167.
- 1168 60. Huege JL, Krall MC, Steinhauser P, Giavalisco R, Rippka. Tandeau de  
1169 Marsac N, Steinhauser D. 2011. Sample amount alternatives for data  
1170 adjustment in comparative cyanobacterial metabolomics. *Anal Bioanal*  
1171 *Chem* 399:3503–3517. [https:// doi: 10.1007/s00216-011-4678-z](https://doi.org/10.1007/s00216-011-4678-z).
- 1172 61. Chong J, Xia J. 2018. *MetaboAnalystR*: an R package for flexible and  
1173 reproducible analysis of metabolomics data. *Bioinformatics* 27 4313–  
1174 4314. [https:// doi: 10.1093/bioinformatics/bty528](https://doi.org/10.1093/bioinformatics/bty528)
- 1175 62. Clinical and Laboratory Standards Institute. Reference method for broth  
1176 dilution antifungal susceptibility testing of filamentous fungi: Approved  
1177 standard M38-A2. CLSI, Wayne, PA, USA, 2017.
- 1178 63. Kurtz S, Phillippy A, Delcher AL, Smoot M, Shumway M, Antonescu C,  
1179 Salzberg SL. 2004. Versatile and open software for comparing large  
1180 genomes. *Genome Biology* 5:R12.
- 1181 64. El-Gebali S, Mistry J, Bateman A, Eddy SR, Luciani A, Potter SC,  
1182 Qureshi M, Richardson LJ, Salazar GA, Smart A, Sonnhammer ELL,  
1183 Hirsh L, Paladin L Piovesan D, Tosatto SCE, Finn RD. 2019. *Nucleic*  
1184 *Acids* 47(Database issue):D427–D432. [https:// doi: 10.1093/nar/gky995](https://doi.org/10.1093/nar/gky995).



- 1185 65. Carver T, Thomson N, Bleasby A, Berriman M, Parkhill J. 2009.  
1186 Bioinformatics (Oxford, England) 25: 119–120. [https://](https://doi.org/10.1093/bioinformatics/btn578)  
1187 [10.1093/bioinformatics/btn578](https://doi.org/10.1093/bioinformatics/btn578).
- 1188 66. Fortwendel JR, Juvvadi PR, Perfect BZ, Rogg LE, Perfect JR, Steinbach  
1189 WJ. 2010. Transcriptional regulation of chitin synthases by calcineurin  
1190 controls paradoxical growth of *Aspergillus fumigatus* in response to  
1191 caspofungin. Antimicrob Agents Chemother 54:1555–1563. [https:// doi:](https://doi.org/10.1128/AAC.00854-09)  
1192 [10.1128/AAC.00854-09](https://doi.org/10.1128/AAC.00854-09).
- 1193 67. Hartree EF. 1972. Determination of protein: a modification of the Lowry  
1194 method that gives a linear photometric response. Anal Biochem 48:422–  
1195 427.
- 1196 68. Manfiolli AO, Siqueira FS, dos Reis TF, Van Dijck P, Schrevens S,  
1197 Hoefgen S, Föge M, Straßburger M, de Assis LJ, Heinekamp T, Rocha  
1198 MC, Janevska S, Brakhage AA, Malavazi I, Goldman GH, Valiante V.  
1199 2019. Mitogen activated protein kinase cross-talk interaction modulates  
1200 the production of melanins in *Aspergillus fumigatus*. mBio 10:e00215-19.  
1201 [https:// doi: 10.1128/mBio.00215-19](https://doi.org/10.1128/mBio.00215-19).
- 1202 69. Weischenfeldt J, Porse B. 2008. Bone Marrow-Derived Macrophages  
1203 (BMM): isolation and applications. Cold Spring Harb Protoc pdb.prot5080  
1204 [pdb.prot5080. https:// doi: 10.1101/pdb.prot5080](https://doi.org/10.1101/pdb.prot5080).
- 1205 70. Bom VLP, de Castro PA, Winkelströter LK, Marine M, Hori JI, Ramalho  
1206 LN, dos Reis TF, Goldman MH, Brown NA, Rajendran R, Ramage G,  
1207 Walker LA, Munro CA, Rocha MC, Malavazi I, Hagiwara D, Goldman  
1208 GH. 2015. The *Aspergillus fumigatus* sitA phosphatase homologue is

1209 important for adhesion, cell wall integrity, biofilm formation, and  
1210 virulence. *Eukaryot Cell* 14:728–744. [https:// doi: 10.1128/EC.00008-15](https://doi.org/10.1128/EC.00008-15).

1211 71. Drewniak A, Gazendam RP, Tool AT, van Houdt M, Jansen MH, van  
1212 Hamme JL, van Leeuwen EM, Roos D, Scalais E, de Beaufort C,  
1213 Janssen H, van den Berg TK, Kuijpers TW. 2013. Invasive fungal  
1214 infection and impaired neutrophil killing in human CARD9 deficiency.  
1215 *Blood* 121:2385–2392. [https:// doi: 10.1182/blood-2012-08-450551](https://doi.org/10.1182/blood-2012-08-450551).

1216 72. Knox BP, Deng Q, Rood M, Eickhoff JC, Keller NP, Huttenlocher A.  
1217 2014. Distinct innate immune phagocyte responses to *Aspergillus*  
1218 *fumigatus* conidia and hyphae in zebrafish larvae. *Eukaryot cell* 13:1266–  
1219 1277. [https:// doi: 10.1128/EC.00080-14](https://doi.org/10.1128/EC.00080-14).

1220 73. Cano LE, Singer-Vermes LM, Vaz CAC, Russo M, Calich VLG. 1995.  
1221 Pulmonary paracoccidioidomycosis in resistant and susceptible mice:  
1222 relationship among progression of infection, bronchoalveolar cell  
1223 activation, cellular immune response, and specific isotype patterns. *Infect*  
1224 *Immun* 63:1777–1783.

1225 74. Guerra ES, Lee CK, Specht CA, Yadav B, Huang H, Akalin A, Huh  
1226 JR, Mueller C, Levitz SM. 2017. Central role of IL-23 and IL-17 producing  
1227 eosinophils as immunomodulatory effector cells in acute pulmonary  
1228 aspergillosis and allergic asthma. *PLoS Pathog* 13:e1006175. [https:// doi: 10.1371/journal.ppat.1006175](https://doi.org/10.1371/journal.ppat.1006175).

1230

1231

1232

1233

1234 **Tables.**

1235 **Table 1.** Number and percentage of identified metabolite quantities that were  
1236 significantly ( $p$ -value < 0.05) different in the *A. nidulans* clinical isolates in  
1237 comparison to the reference strain when strains were grown in the presence of  
1238 glucose, ethanol, acetate and mucin for 16 h.

1239

| Carbon Sources | Differentialy Metabolites Produced (%) |                           |
|----------------|----------------------------------------|---------------------------|
|                | MO80069 vs<br>FGSC-A4                  | SP-2605-48 vs.<br>FGSC-A4 |
| Glucose        | 18/40 (45%)                            | 15/40 (38%)               |
| Ethanol        | 22/40 (55%)                            | 23/40 (58%)               |
| Acetate        | 23/44 (52%)                            | 30/44 (68%)               |
| Mucin          | 24/44 (55%)                            | 14/44 (32%)               |

1240

1241

1242

1243

1244

1245

1246

1247

1248

1249

1250

1251

1252

1253

1254

1255

1256

1257

1258

1259

1260

1261

1262 **Table 2.** Significant metabolic pathway enrichments

1263

1264

| <b>Carbon source</b> | <b>MO80026</b>                                                             | <b>SP-2605-48</b>                                                                     |
|----------------------|----------------------------------------------------------------------------|---------------------------------------------------------------------------------------|
| Glucose              | Aminoacyl-tRNA biosynthesis<br>Arginine and proline metabolism             | Aminoacyl-tRNA biosynthesis<br>Arginine and proline metabolism                        |
|                      | Aminoacyl-tRNA biosynthesis<br>Alanine, aspartate and glutamate metabolism |                                                                                       |
| Acetate              | Cyanoamino acid metabolism<br>Valine, leucine and isoleucine metabolism    | Aminoacyl-tRNA biosynthesis<br>Beta-alanine metabolism                                |
|                      | Glycine, serine and threonine metabolism                                   |                                                                                       |
|                      | Aminoacyl-tRNA biosynthesis<br>Arginine and proline metabolism             | Aminoacyl-tRNA biosynthesis<br>Arginine and proline metabolism<br>Nitrogen metabolism |
| Ethanol              | Aminoacyl-tRNA biosynthesis<br>Arginine and proline metabolism             | Alanine, aspartate and glutamate metabolism                                           |

1265

1266

1267

1268

1269

1270

1271

1272

1273

1274

1275

1276

1277

1278

1279

1280

1281 **Table 3.** Minimum inhibitory concentrations (MIC) of voriconazole,  
1282 posaconazole and amphotericin B on the *A. nidulans* clinical isolates MO80069  
1283 and SP-2605-48 and the FGSC-A4 reference strain.  
1284  
1285  
1286  
1287

| Strains  | MIC ( $\mu\text{g/mL}$ ) |              |                |
|----------|--------------------------|--------------|----------------|
|          | Voriconazole             | Posaconazole | Amphotericin B |
| FGSC-A4  | 0.25                     | 1.0          | 2.0            |
| MO80026  | 0.25                     | 1.0          | 2.0            |
| SP260548 | 0.25                     | 1.0          | 2.0            |

1288

1289

1290

1291

1292

1293

1294

1295

1296

1297

1298

1299

1300

1301

1302

1303

1304

1305

1306

1307 **Table 4.** Cleistothecia formation and density and ascospore viability resulting  
 1308 from diverse *A. nidulans* self- and out-crosses (A4 = FGSC-A4 reference strain,  
 1309 MO = MO80069, SP = SP-2605-48).  
 1310

| Temperature | Cross    | Cleistothecia production | Cleistothecia density (cleistothecia/cm <sup>2</sup> ) | Ascospores Viability (%) |
|-------------|----------|--------------------------|--------------------------------------------------------|--------------------------|
| 30 °C       | A4 X A4  | Yes                      | 15.0 ± 0.81                                            | 91.83 ± 3.53             |
|             | MO X MO  | Yes                      | 7.0 ± 1.35                                             | 92.83 ± 3.96             |
|             | SP X SP  | Yes                      | 0.25 ± 0.25                                            | 89.83 ± 3.51             |
|             | MO X R21 | Yes                      | 1.25 ± 0.25                                            | 94.83 ± 3.85             |
|             | SP X R21 | No                       | -                                                      | -                        |
| 37 °C       | A4 X A4  | Yes                      | 9.75 ± 1.43                                            | 90.67 ± 3.62             |
|             | MO X MO  | Yes                      | 5.25 ± 1.31                                            | 92.5 ± 2.76              |
|             | SP X SP  | No                       | -                                                      | -                        |
|             | MO X R21 | Yes                      | 5 ± 0.40                                               | 92.5 ± 1.28              |
|             | SP X R21 | No                       | -                                                      | -                        |

1311

1312

1313

1314

1315

1316

1317

1318

1319

1320

1321

1322

1323

1324

1325

1326

1327 **Table 5.** Type and total amount of single nucleotide polymorphisms (SNPs) and  
1328 long insertions and deletions (indels) detected in the genomes of the *A.*  
1329 *nidulans* clinical isolates MO80069 and SP-2605-48 when compared to the  
1330 FGSC-A4 reference genome or in both clinical strains.

| <b>Mutation</b>      | <b>MO80069 and<br/>FGSC A4</b> | <b>SP-2605-48 and<br/>FGSC A4</b> | <b>SP-2605-48 and<br/>MO80069</b> |
|----------------------|--------------------------------|-----------------------------------|-----------------------------------|
| Stop codon gain/loss | 149                            | 110                               | 170                               |
| Frameshift           | 352                            | 355                               | 256                               |
| Missense             | 6,271                          | 5,896                             | 6,288                             |
| Synonymous           | 6,184                          | 6,038                             | 6,122                             |
| <b>Total SNPs</b>    | <b>12,956</b>                  | <b>12,399</b>                     | <b>12,836</b>                     |
| Insertions           | 234                            | 308                               | 222                               |
| Deletion             | 114                            | 138                               | 207                               |
| <b>Total Indels</b>  | <b>348</b>                     | <b>446</b>                        | <b>375</b>                        |

1331

1332

1333

1334

1335

1336

1337

1338

1339

1340

1341

1342

1343

1344

1345

1346

1347

1348

1349 **Table 6.** Strains used in this study (NA = not applicable).

| <b>Strain</b>              | <b>Genotype</b>                      | <b>Source</b>                                                                      | <b>Reference</b>        |
|----------------------------|--------------------------------------|------------------------------------------------------------------------------------|-------------------------|
| FGSC-A4                    | Glasgow Wild type<br>( <i>veA+</i> ) | Soil                                                                               | Pontecorvo et al (1953) |
| MO80069                    | Wild type, clinical isolate          | Bronchoalveolar lavage of a patient with breast carcinoma and pneumonia (Portugal) | This study              |
| SP-2605-48                 | Wild type, clinical isolate          | Patient with cystic fibrosis who underwent lung transplantation (Belgium)          | This study              |
| R21XR135                   | <i>pabaA1;yA2</i>                    | NA                                                                                 | This study              |
| MO80069 <i>pyrG-</i>       | <i>pyrG89</i>                        | This study                                                                         | This study              |
| SP-2605-48<br><i>pyrG-</i> | <i>pyrG89</i>                        | This study                                                                         | This study              |
| <i>ΔmpkA</i>               | <i>ΔakuB mpkA::ptrA; PTR</i>         | NA                                                                                 | Manfioli et al. (2019)  |

1350

1351

1352

1353

1354

1355

1356

1357

1358

1359

1360

1361

1362

1363

1364

1365



1366

1367 **Figures Captions**

1368 **Figure 1.** The *A. nidulans* clinical isolates exhibit improved growth in the  
1369 presence of alternative carbon and lipid sources. Strains were grown in liquid  
1370 MM supplemented with glucose, acetate, ethanol, mucin, tween 20 and 80,  
1371 olive oil and casamino acids at 37°C for 48 h (glucose) or 72 h (others) before  
1372 fungal biomass was freeze-dried and weighed. Standard deviations were  
1373 determined from biological triplicates with \*\* $p<0.01$ ; \*\*\* $p<0.001$ ; \*\*\*\* $p<0.0001$  in  
1374 a one-way ANOVA with Tukey post-test comparing growth of the clinical  
1375 isolates to the FGSC-A4 reference strain.

1376

1377 **Figure 2.** The *A. nidulans* clinical isolates are metabolically different from the  
1378 reference strain in the presence of different carbon sources. Heat maps  
1379 depicting log-fold changes of identified metabolite quantities, that were  
1380 significantly ( $p<0.05$ ) different in the *A. nidulans* clinical isolates MO80069 and  
1381 SP-2605-48 when compared to the FGSC-A4 reference strain (grey squares  
1382 depict metabolite quantities that were not detected as significantly different in  
1383 one of the clinical isolates).

1384

1385 **Figure 3.** The *A. nidulans* clinical isolates are more sensitive to the cell wall-  
1386 perturbing agents. Strains were grown from 10<sup>5</sup> spores on glucose minimal  
1387 medium supplemented with increasing concentration of (A) caspofungin, (B)  
1388 congo red and (C) calcofluor white for 5 days at 37°C. Standard deviations  
1389 represent biological triplicates with \*\* $p<0.01$ ; \*\*\* $p<0.001$ ; \*\*\*\* $p<0.0001$  in a two-

1390 way ANOVA test, comparing growth of the clinical isolates to the FGSC-A4  
1391 reference strain.

1392 **Figure 4.** Diagram depicting the location of all detected non-synonymous single  
1393 nucleotide polymorphisms (SNPs) on the 8 chromosomes (chr I – VIII) of the *A.*  
1394 *nidulans* clinical isolates SP-2605-48 and MO80069 in comparison to the  
1395 FGSC-A4 reference genome.

1396

1397 **Figure 5.** Diagram depicting the location of all detected small deletions on the 8  
1398 chromosomes (chr I – VIII) of the *A. nidulans* clinical isolates SP-2605-48 and  
1399 MO80069 in comparison to the FGSC-A4 reference genome. Also shown are  
1400 the location of putative transposons in the *A. nidulans* reference genome.

1401

1402 **Figure 6.** MpkA is not phosphorylated in the *A. nidulans* clinical isolates  
1403 MO80069 and SP-2605-48 in the presence of NaCl-induced cell wall stress  
1404 when compared to the FGSC-A4 reference strain. Strains were grown from  
1405  $1 \times 10^7$  spores in complete medium for 16 h (control, 0 min) at 37°C before 0.5 M  
1406 NaCl was added for 10 and 30 min. Total cellular protein was extracted and  
1407 western blotting was carried out probing for phosphorylated MpkA. Signals were  
1408 normalized by the amount of total MpkA present in the protein extracts and  
1409 cellular extracts from the  $\Delta mpkA$  strain were used as a negative control.

1410

1411 **Figure 7.** The *A. nidulans* clinical isolates MO80069 and SP-2605-48 do not  
1412 present increased survival in the presence of macrophages and neutrophils. (A)  
1413 Percentage of phagocytised conidia by murine wild-type and *gp91<sup>phox</sup>* knockout  
1414 macrophages. Macrophages were incubated for 1.5 h with conidia from the

1415 respective strains before phagocytised conidia were counted. **(B)** Colony  
1416 forming units (CFU) as a measure of conidia viability after passage through  
1417 wild-type (wt) and *gp91<sup>phox</sup>* knockout macrophages. Macrophages were  
1418 incubated with the respective conidia for 1.5 h before they were lysed and  
1419 contents were plated on complete medium. **(C)** Percentage of viable hyphal  
1420 germings after incubation for 16 h with neutrophils from healthy human donors.  
1421 Strain viability was calculated relative to incubation without PMN cells, which  
1422 was set at 100% for each sample. Standard deviations represent biological  
1423 triplicates with \* $p < 0.05$  and \*\* $p < 0.01$  when comparing the clinical isolates to  
1424 FGSC-A4; # $p < 0.05$  comparing the same strain in the two types of macrophages  
1425 in a one-way ANOVA test with Tukey post-test.

1426

1427 **Figure 8.** *A. nidulans* strain-specific virulence depends on the host immune  
1428 status. The virulence of the *A. nidulans* clinical isolates MO80069 and SP-  
1429 260548 were tested in murine **(A-E)** and zebrafish **(B-F)** models of pulmonary  
1430 and invasive aspergillosis. Animals were manipulated in order to give rise to  
1431 either immunocompetent **(A-B)**, CGD (chronic granulomatous disease) **(C-D)** or  
1432 neutropenic **(E)**/neutrophilic **(F)** models. Shown are survival curves for each  
1433 immunosuppression and animal model. No difference in virulence was detected  
1434 for all strains in both immunocompetent and CGD mice. Strain MO80069 was  
1435 significantly more virulent in neutropenic mice and neutrophilic zebrafish.  
1436 \*\* $p < 0.01$ ; \*\*\*\* $p < 0.0001$  when comparing survival curves of the clinical isolates  
1437 to the FGSC-A4 reference strain in a two-way ANOVA test with Tukey post-test.

1438

1439

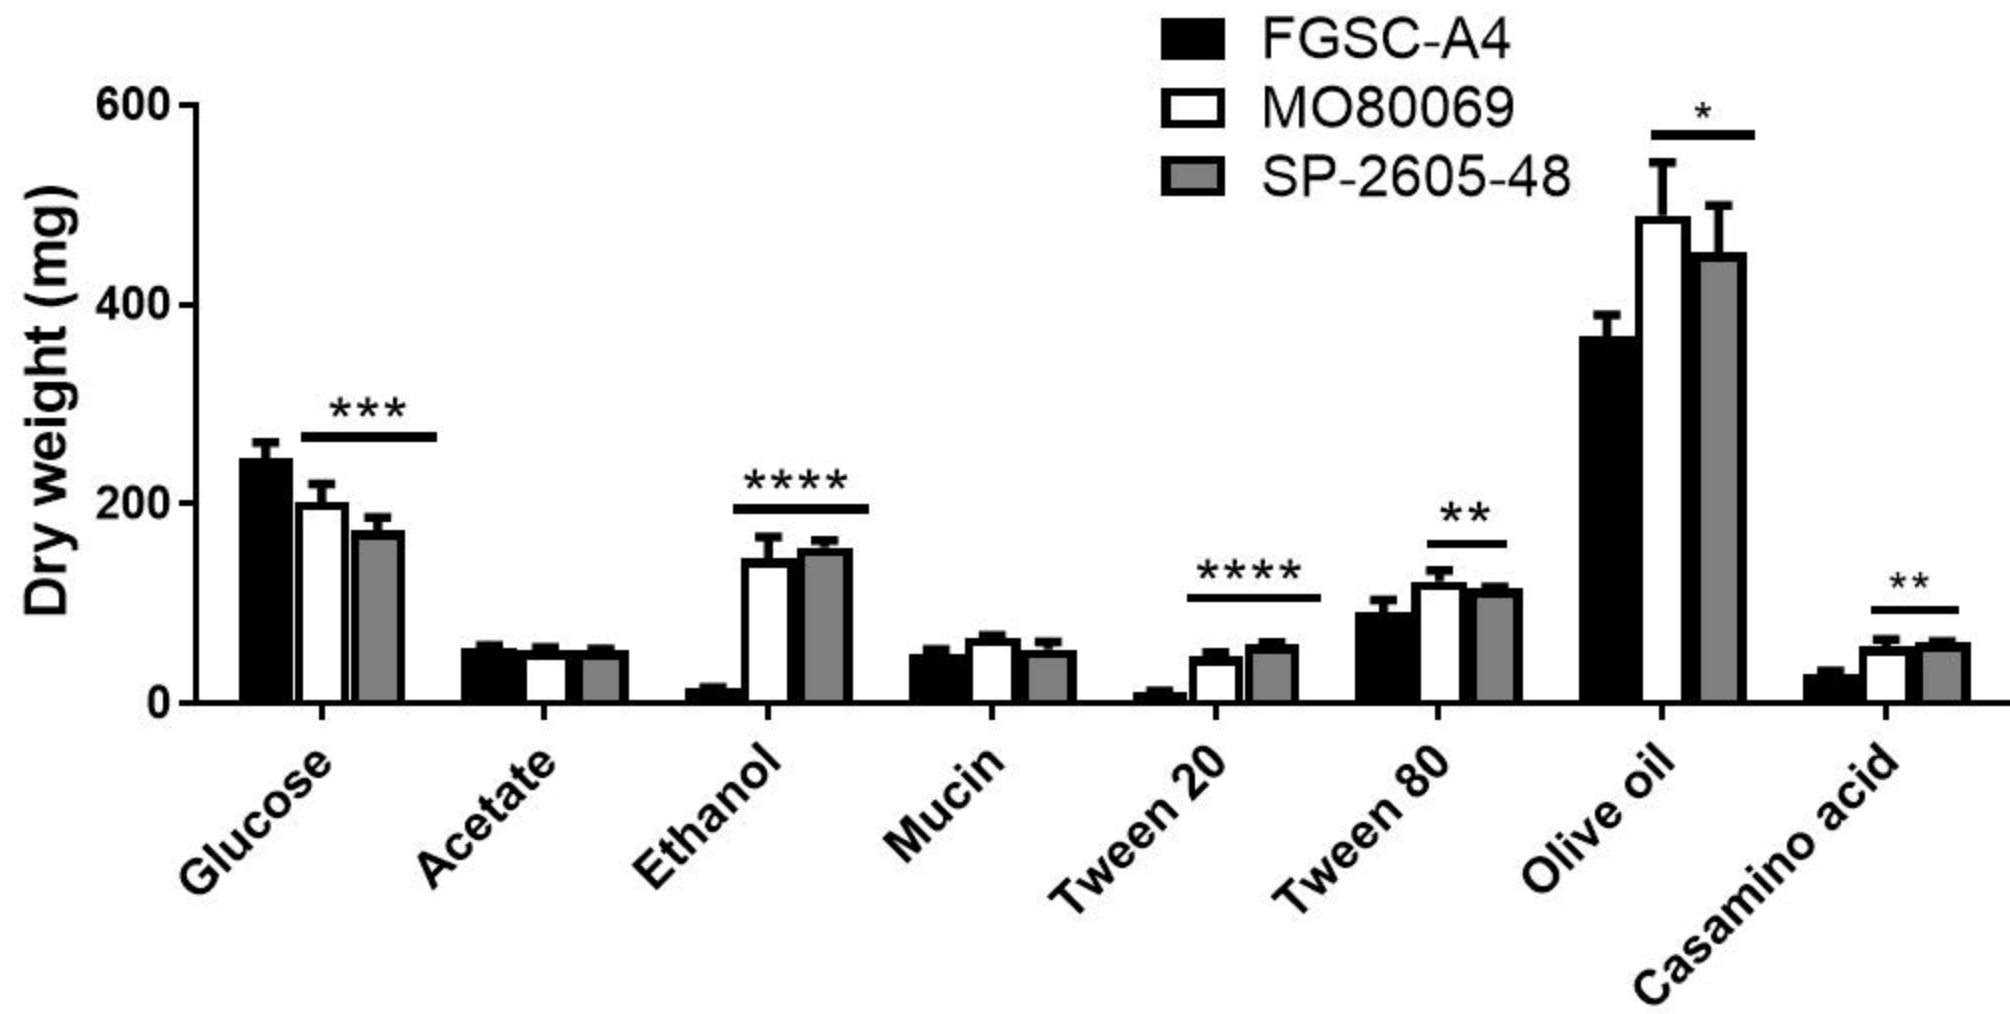

### A Glucose

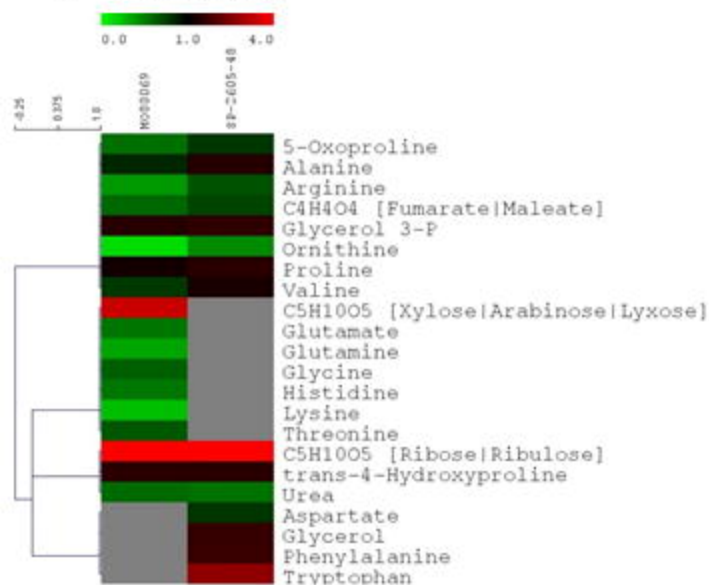

### B Acetate

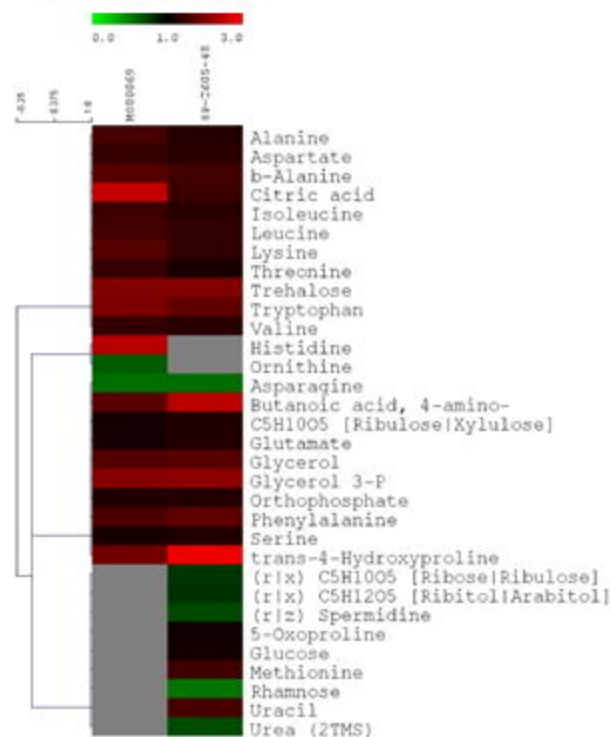

### C Ethanol

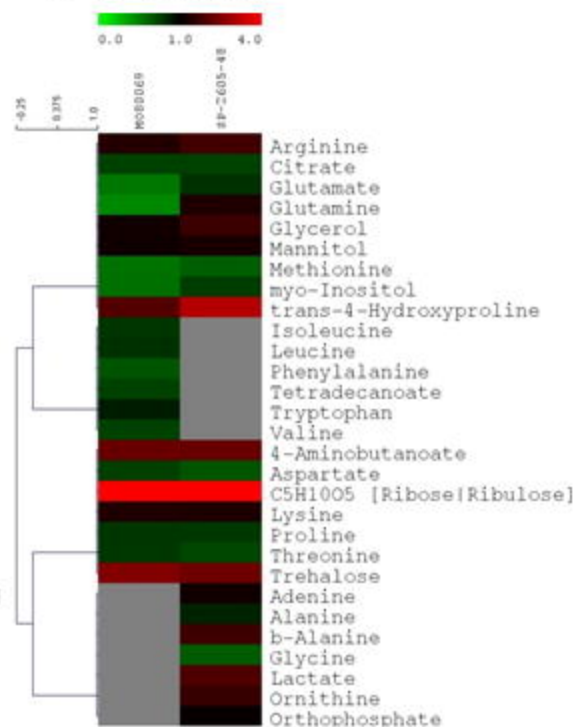

### D Mucin

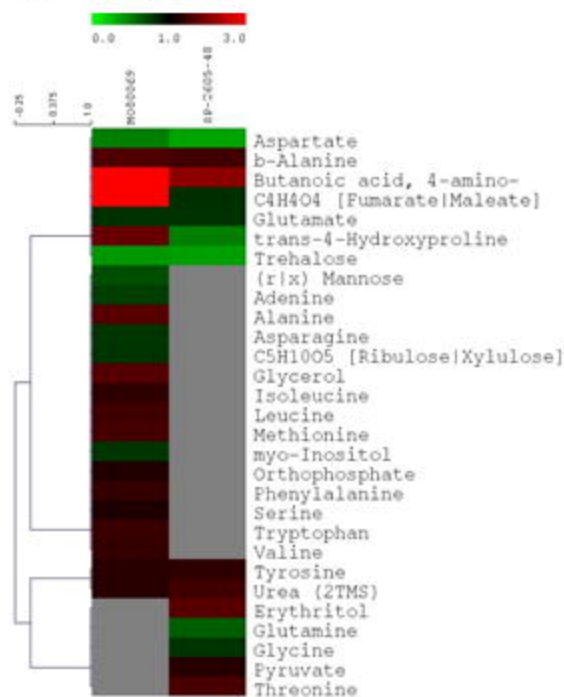

**A**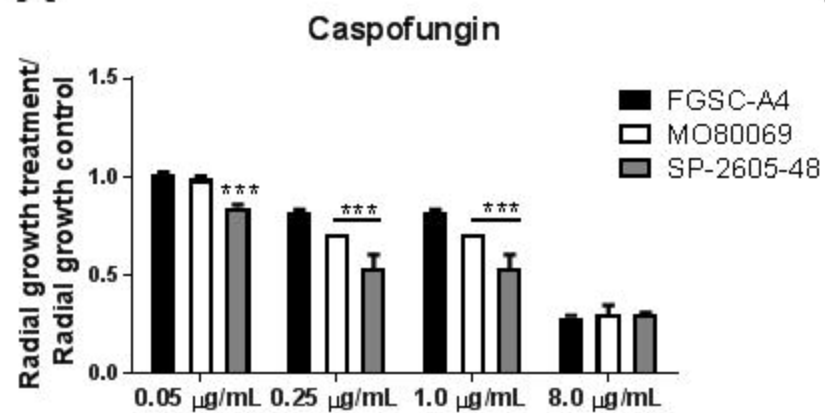**B**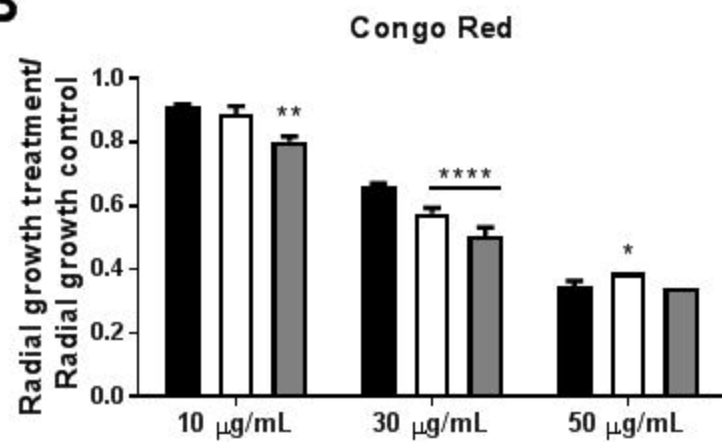**C**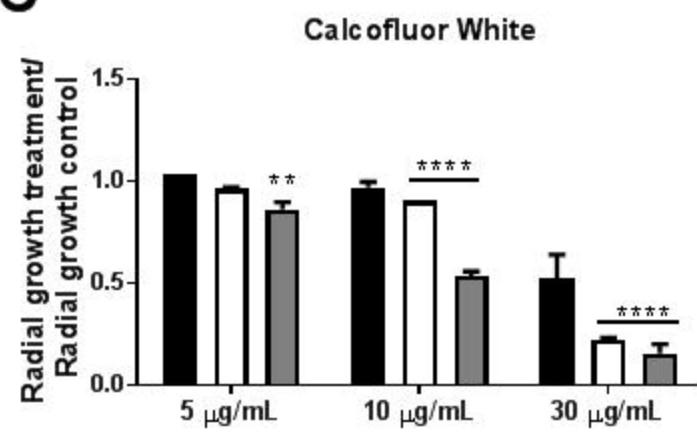

Legend:

- SP-2605-48 non-synonymous SNPs
- MO800069 non-synonymous SNPs
- Reference genome

Chr I

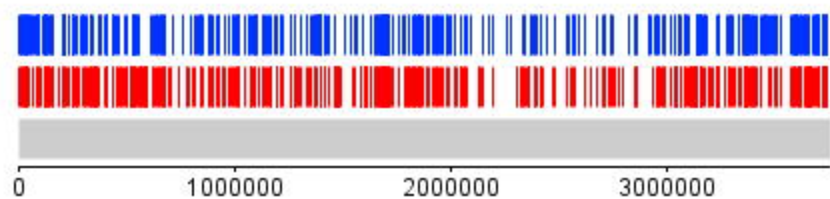

Chr V

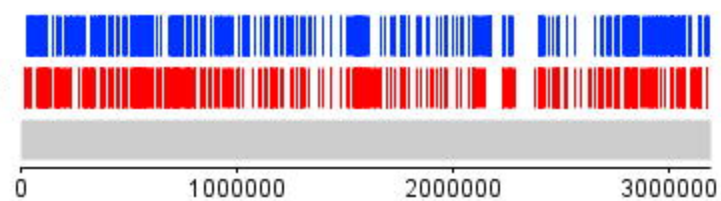

Chr II

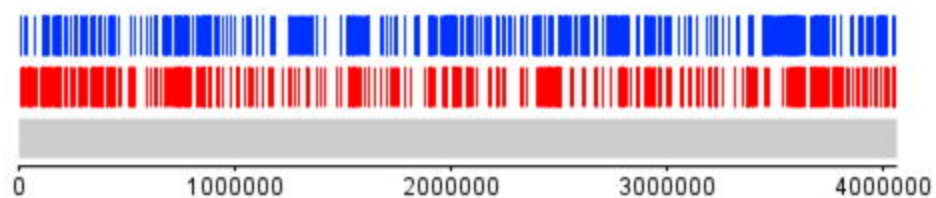

Chr VI

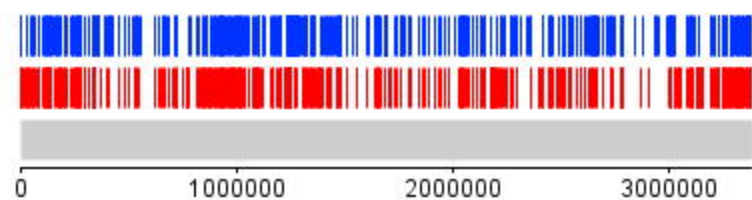

Chr III

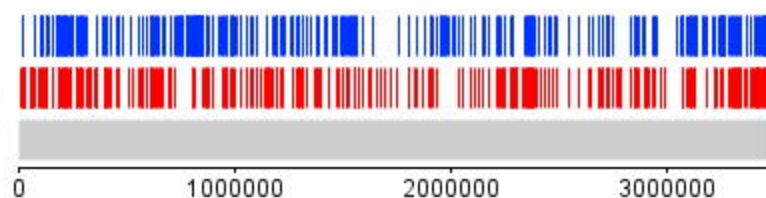

Chr VII

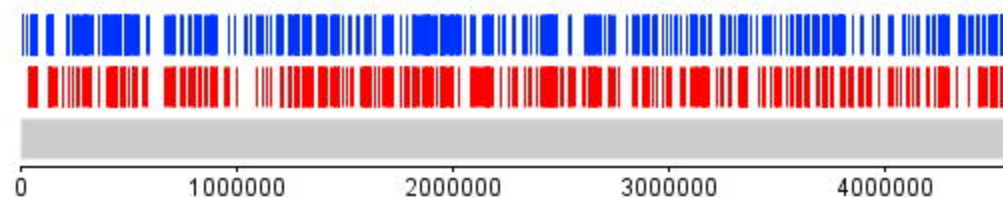

Chr IV

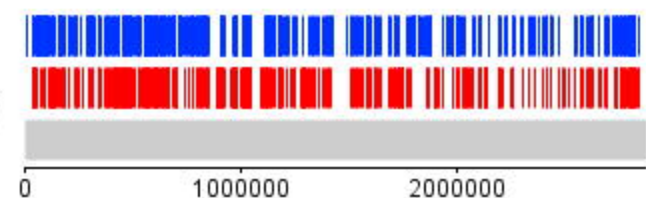

Chr VIII

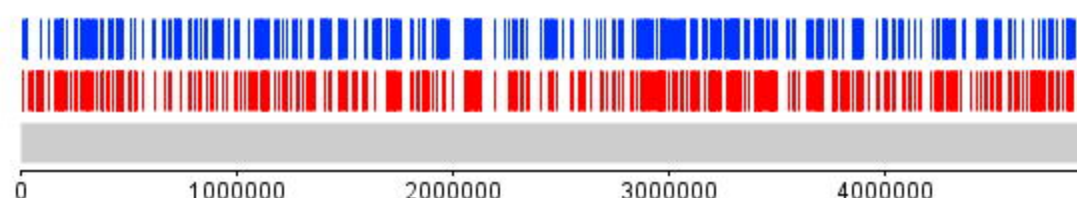

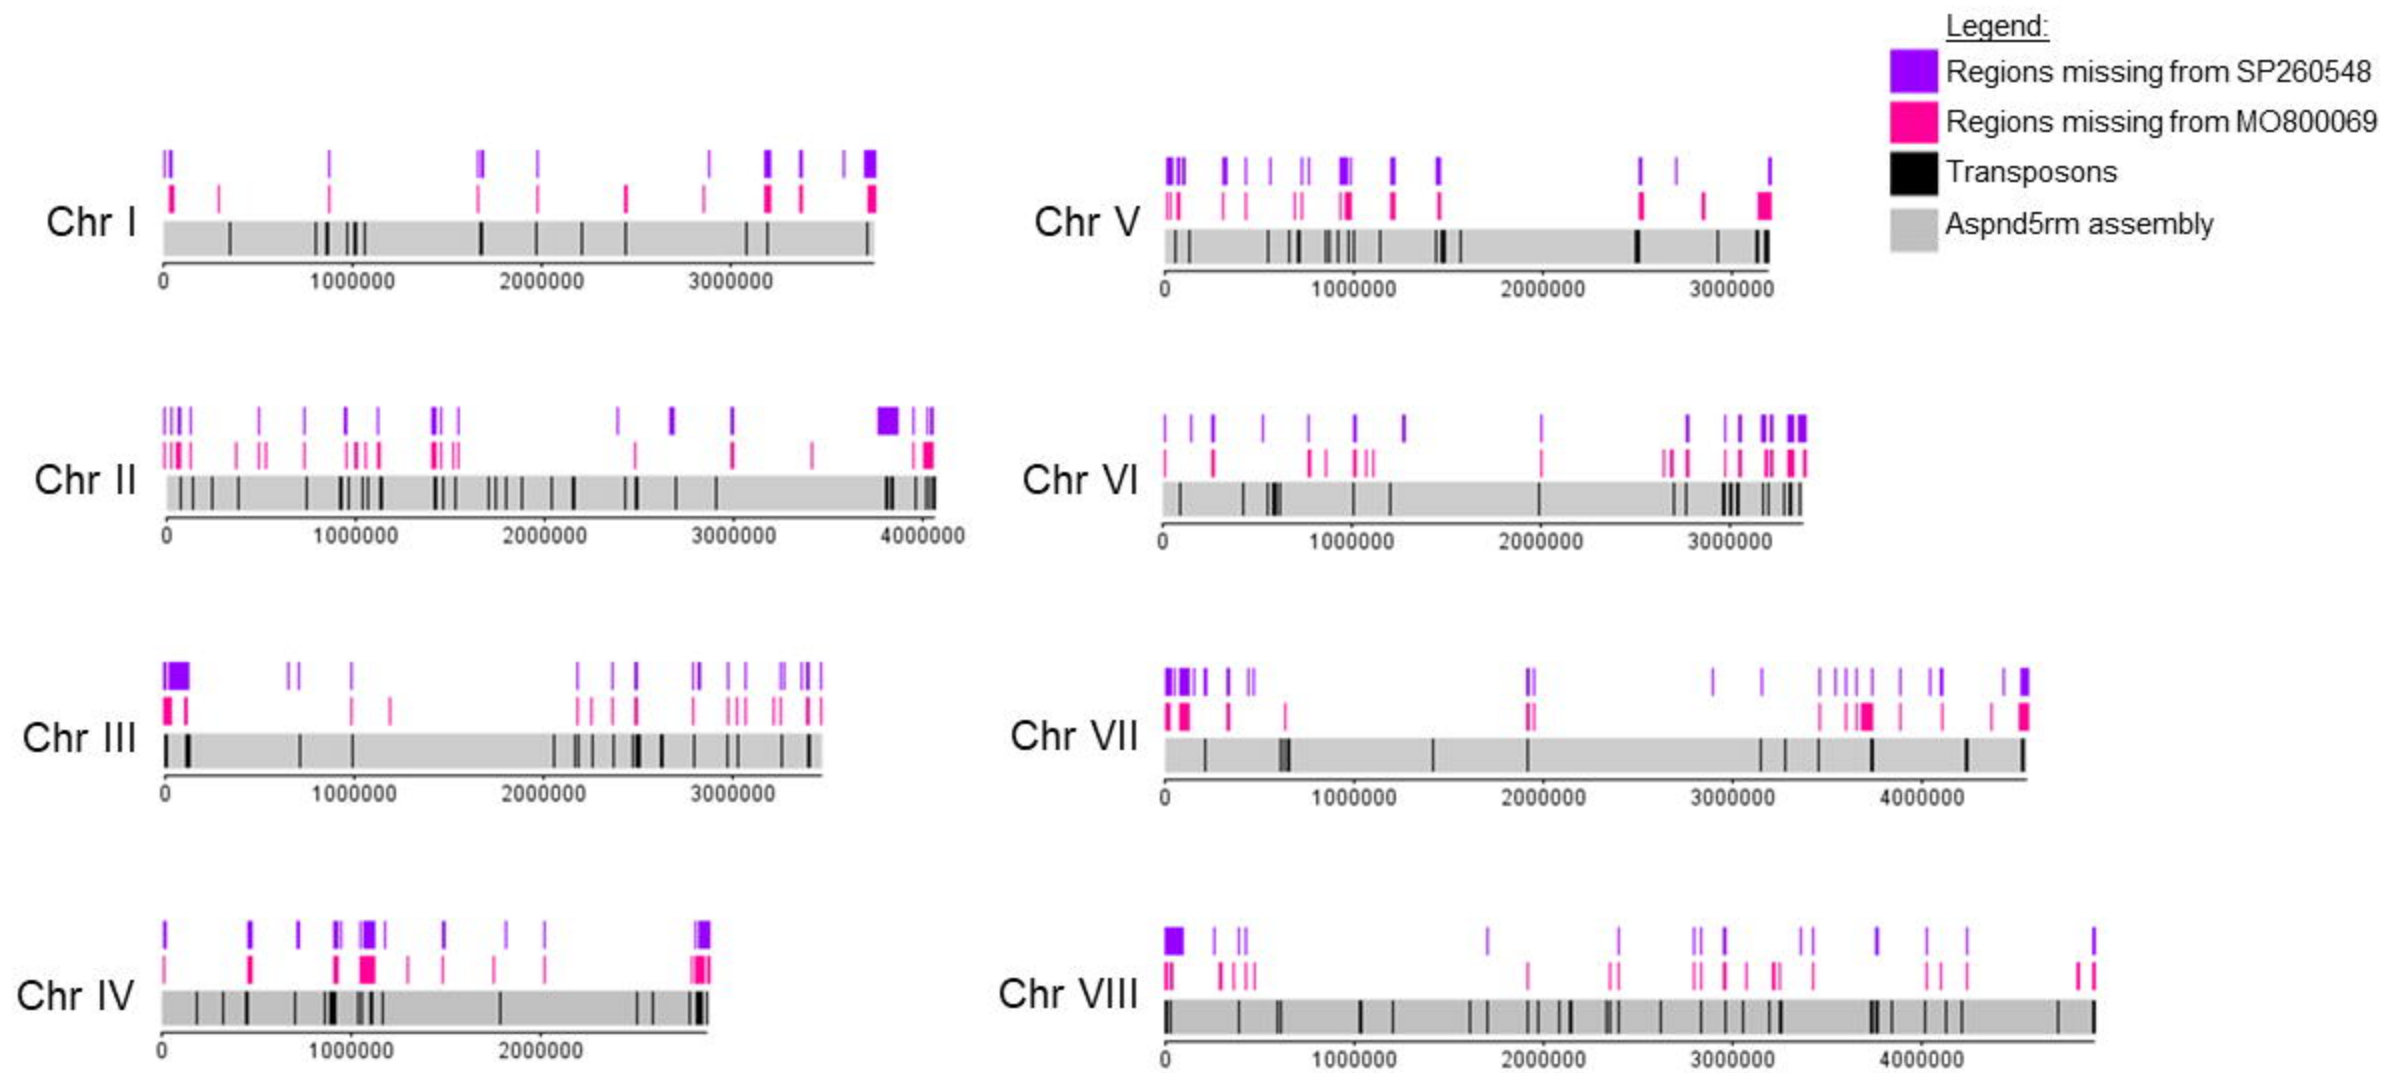



NaCl 0.5 M

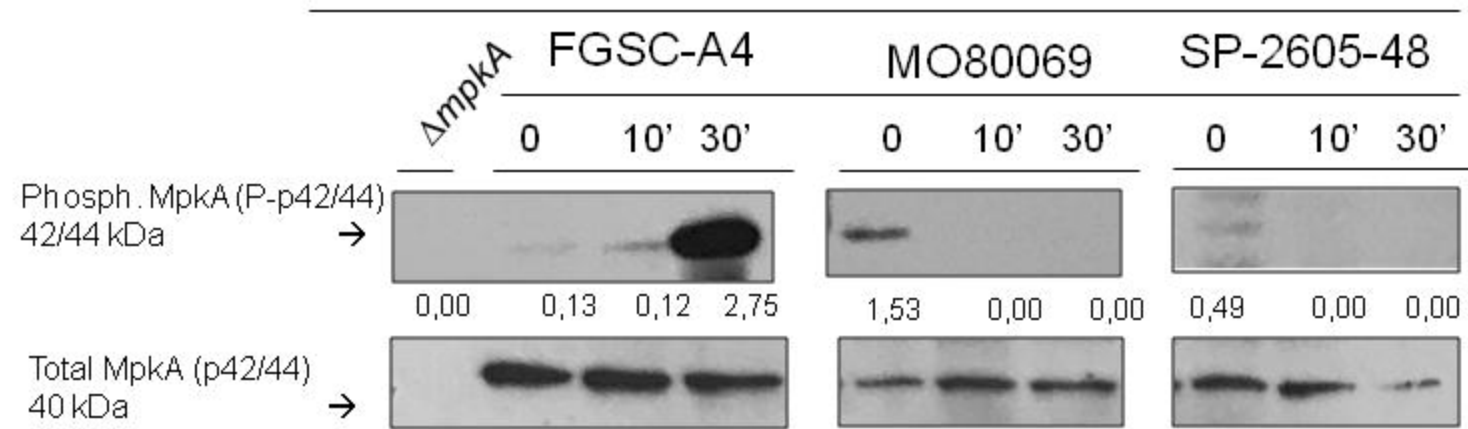

**A**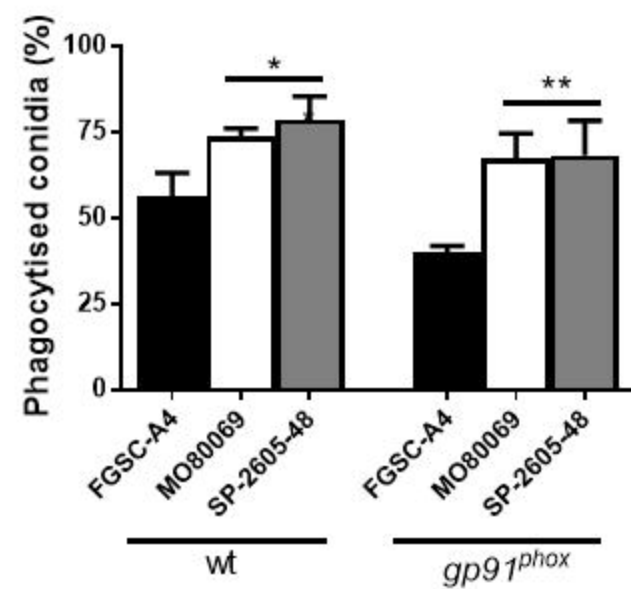**B**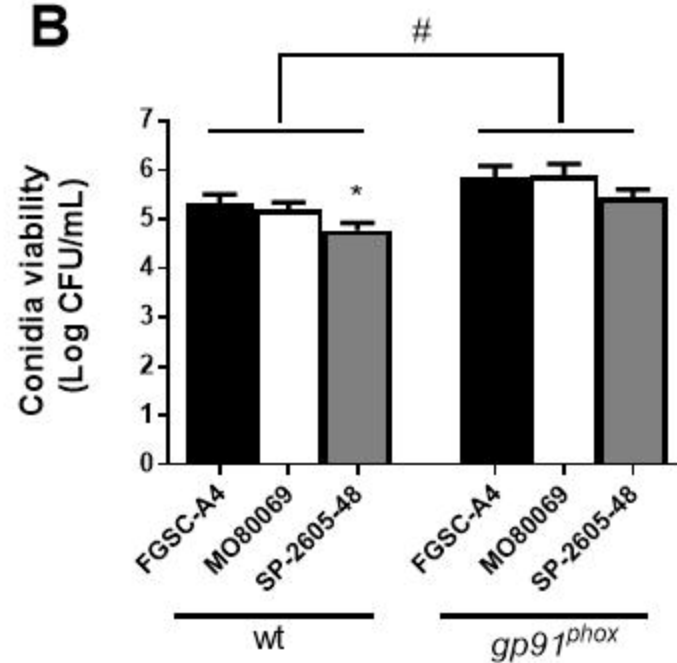**C**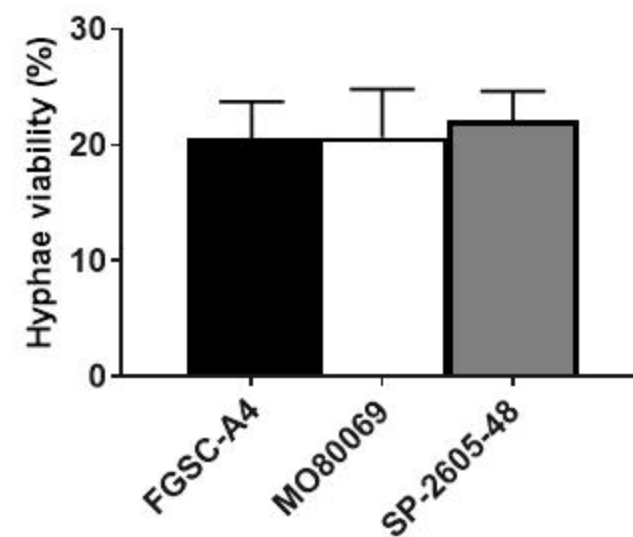

**A** Immunocompetent mouse model (n=10)

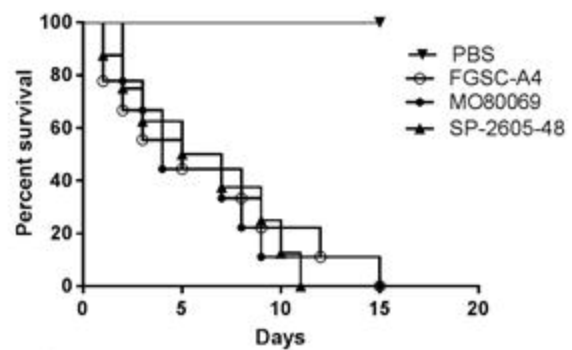

**B** Immunocompetent Zebrafish model (n=72)

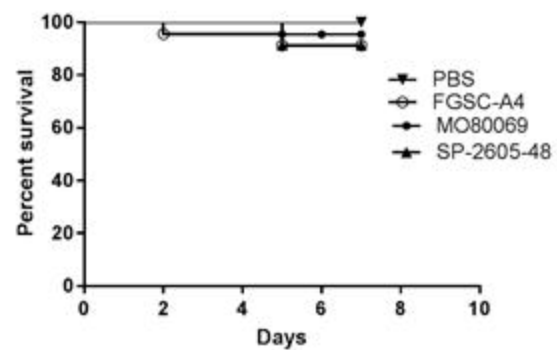

**C** CGD mouse model (n=7)

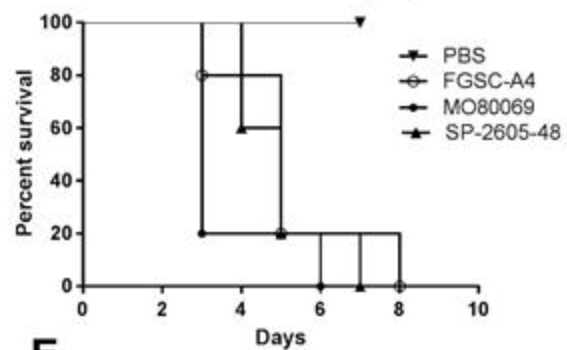

**D** CGD zebrafish model (n=80)

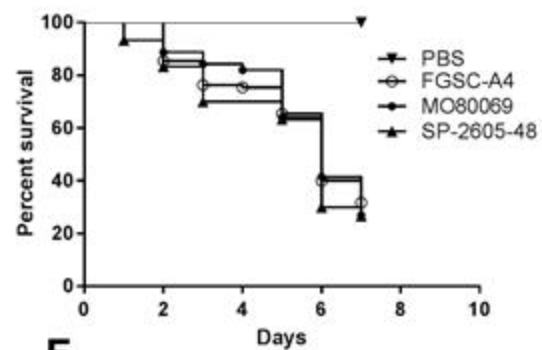

**E** Neutropenic mouse model (n=10)

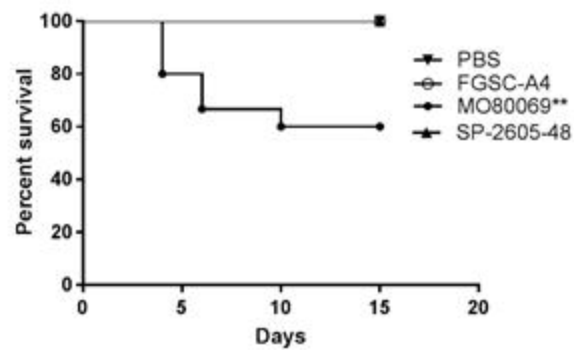

**F** Neutrophilic zebrafish model (n= 84)

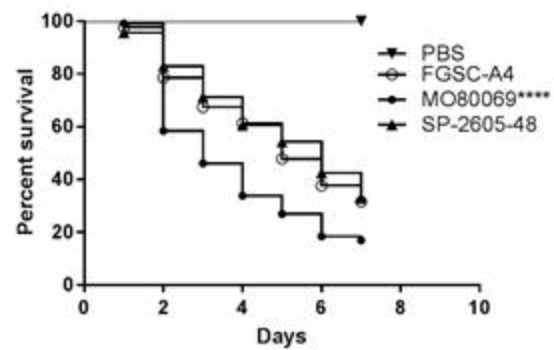

Source: https://www.biorxiv.org/content/10.1101/2020.01.28.917278v1.full.pdf
